# Supplementary material
Source: PubMed Central journal article supplement (PMC3441833)
Supplement: NIHMS91197-supplement-1_si_001.pdf [file NIHMS91197-supplement-1_si_001.pdf]

## SUPPORTING INFORMATION

### Histone Deacetylase Inhibitors through Click Chemistry

Jie Shen, Robert Woodward, James Patrick Kedenburg,

Xianwei Liu, Min Chen, Lanyan Fang, Duxin Sun and Peng George  
Wang\*

#### Table of Contents

| <b>Pages :</b> | <b>Contents</b>                                                     |
|----------------|---------------------------------------------------------------------|
| <b>S2—S6</b>   | : HPLC analyses of the purities of target compounds                 |
| <b>S7-S40:</b> | : <sup>1</sup> HNMR and <sup>13</sup> CNMR spectra of new compounds |
| <b>S41-S47</b> | : Preliminary NCI cancer cell line screening results                |

**Table S1. HPLC Analysis of Target compounds**

| Cmpd.     | Column Condition <sup>(a)</sup> |                                    | Retention time | Purity result            |
|-----------|---------------------------------|------------------------------------|----------------|--------------------------|
|           | 0-15 min                        | 15-25 min                          |                |                          |
| <b>5a</b> | 16 % solvent B<br>constant      | 16 % to 90 %<br>solvent B gradient | 6.56 min       | 97.2 % <sup>(b)</sup>    |
| <b>5b</b> | 16 % solvent B<br>constant      | 16 % to 90 %<br>solvent B gradient | 10.60 min      | > 99.0 %                 |
| <b>5c</b> | 22 % solvent B<br>constant      | 16 % to 90 %<br>solvent B gradient | 8.75 min       | >99.0 %                  |
| <b>5d</b> | 16 % solvent B<br>constant      | 16 % to 90 %<br>solvent B gradient | 11.14 min      | > 99.0 %                 |
| <b>5e</b> | 16 % solvent B<br>constant      | 16 % to 90 %<br>solvent B gradient | 5.71 min       | 96.5 % <sup>(c)</sup>    |
| <b>5f</b> | 12 % solvent B<br>constant      | 12% to 90 %<br>solvent B gradient  | 7.66 min       | > 99.0 %                 |
| <b>5g</b> | 25 % solvent B<br>constant      | 25 % to 90 %<br>solvent B gradient | 5.83 min       | 98.3 % <sup>(d)(g)</sup> |
| <b>6a</b> | 12 % solvent B<br>constant      | 12 % to 90 %<br>solvent B gradient | 7.10 min       | > 99.0 %                 |
| <b>6b</b> | 12 % solvent B<br>constant      | 12 % to 90 %<br>solvent B gradient | 12.22 min      | 98.0 % <sup>(e)</sup>    |
| <b>6c</b> | 20 % solvent B<br>constant      | 20 % to 90 %<br>solvent B gradient | 8.99 min       | > 99.0 %                 |
| <b>6d</b> | 12 % solvent B<br>constant      | 12 % to 90 %<br>solvent B gradient | 12.71 min      | > 99.0 %                 |
| <b>6e</b> | 12 % solvent B<br>constant      | 12 % to 90 %<br>solvent B gradient | 6.57 min       | > 99.0 %                 |
| <b>6f</b> | 10 % solvent B<br>constant      | 10 % to 90 %<br>solvent B gradient | 6.83 min       | > 99.0 %                 |
| <b>6g</b> | 20 % solvent B<br>constant      | 20 % to 90 %<br>solvent B gradient | 8.79 min       | 97.7 % <sup>(f)</sup>    |

(a) solvent A, 0.4 % TFA in water; solvent B, 0.4 % TFA in acetonitrile; total flow rate: 0.5 mL/min; column: Kromasil®C18, 3.5um, 30 X 4.6 from Restek Corporation; detector: UV absorption at 256 nm; (b) impurity (~2.8 %) at 9.41 min; (c) impurity (~3.5 %) at 6.83 min; (d) impurities (~ 0.6 % and ~ 1.1 %) at 6.68 min and 15.73 min respectively; (e) impurities (~1.6 % and ~0.4 %) at 10.04 min and 13.42 min respectively; (f) impurities (~1.1 % and ~1.2 %) at 7.20 min and 11.74 min respectively; (g) **5g** is the key target compound in this paper.

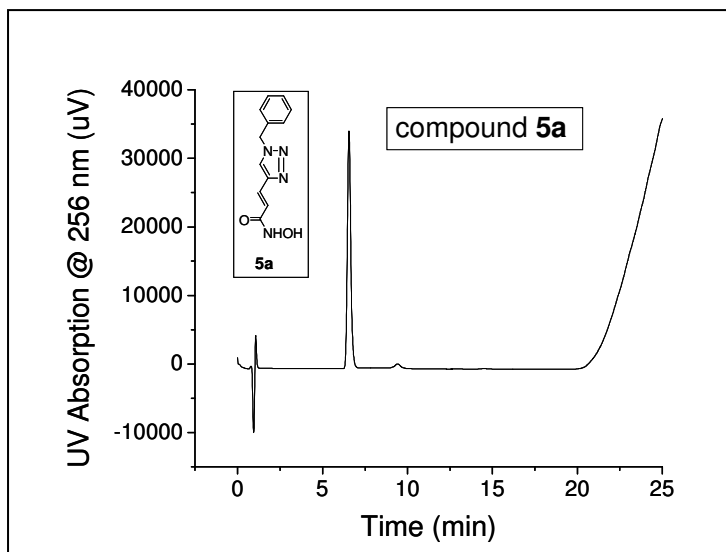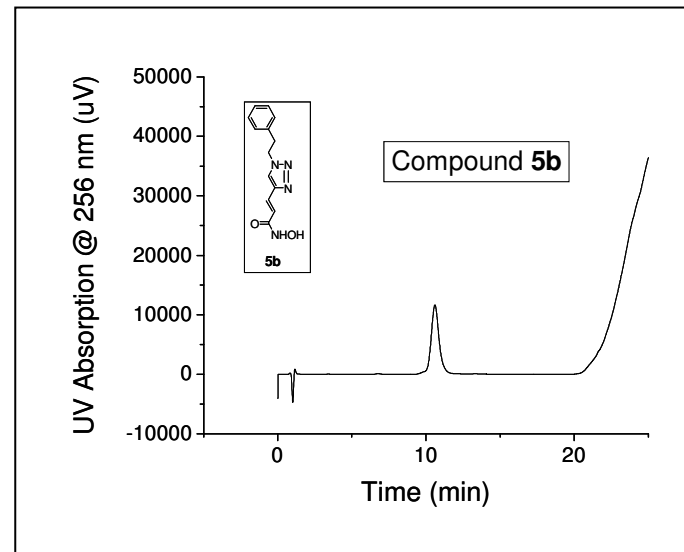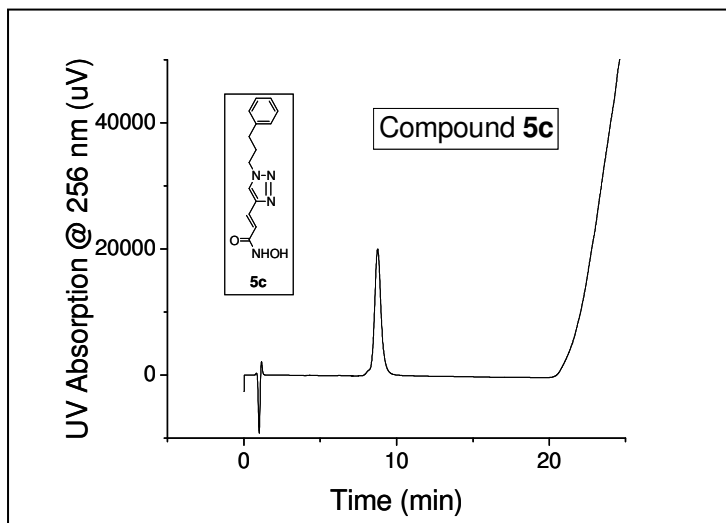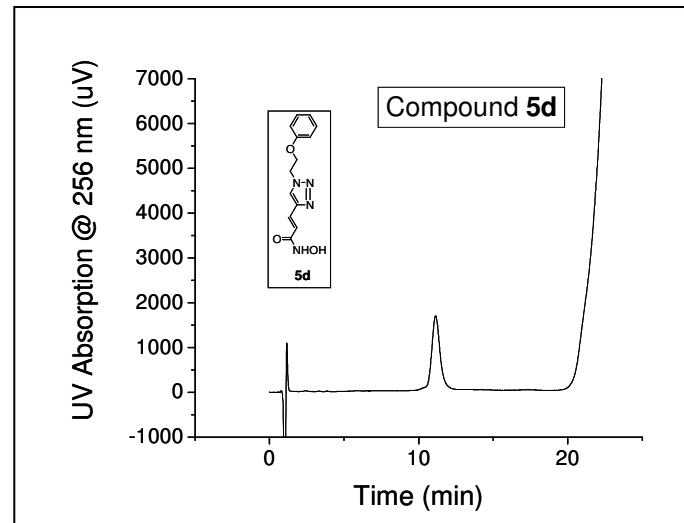

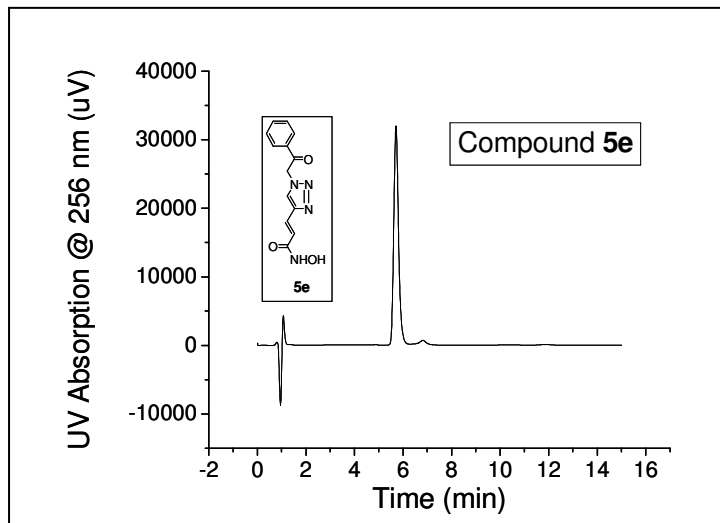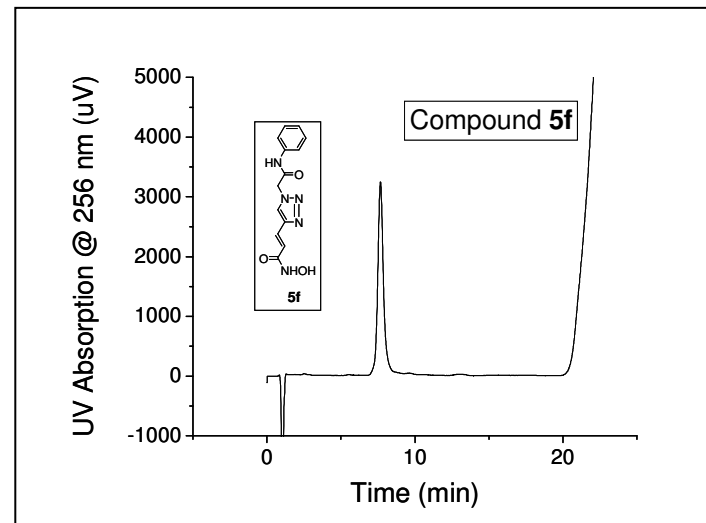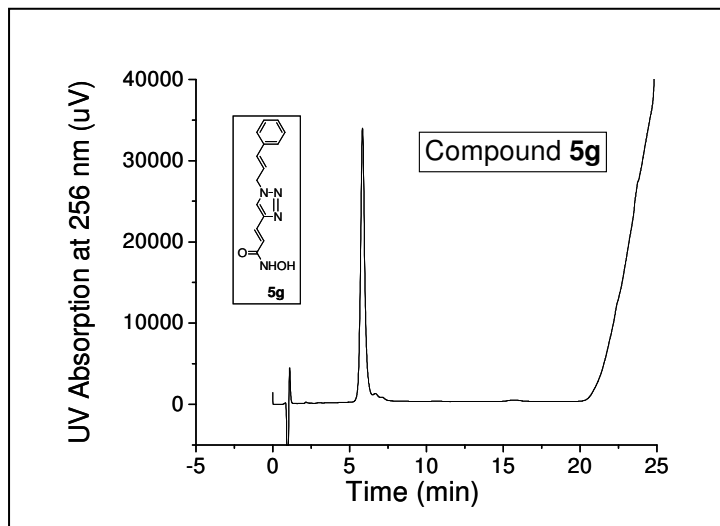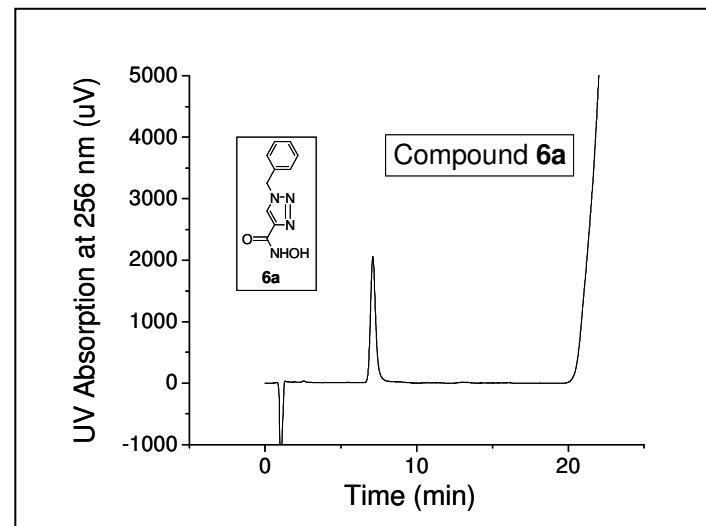



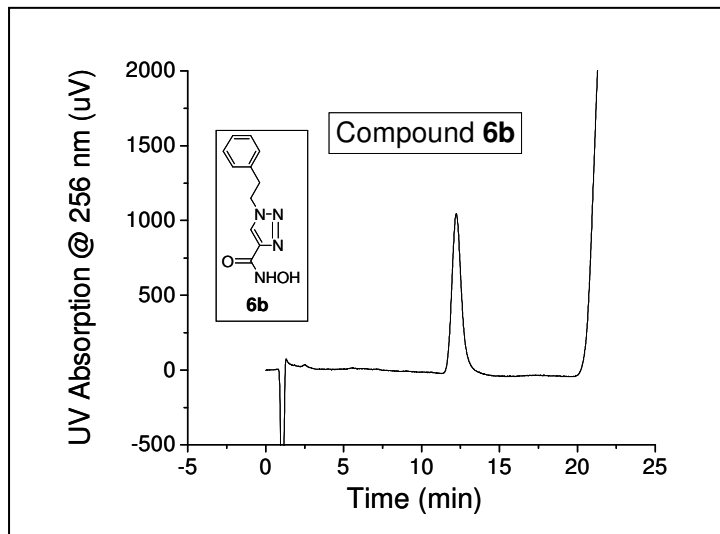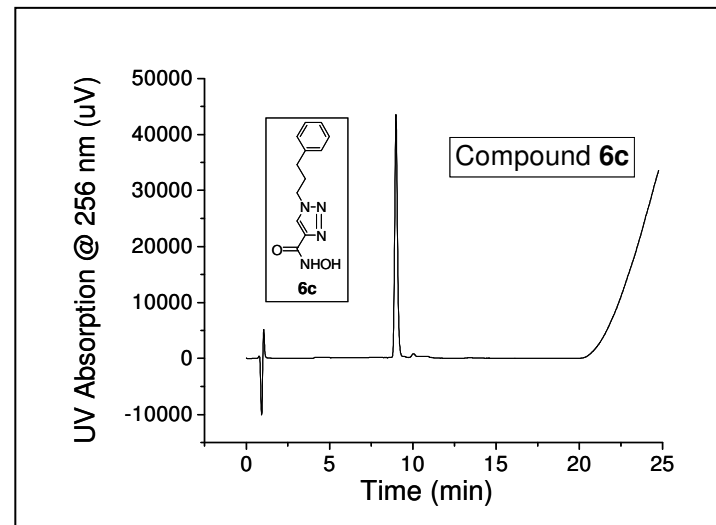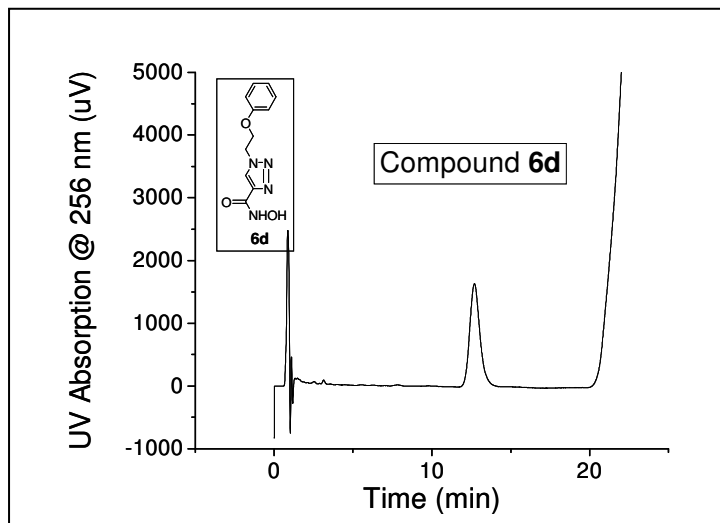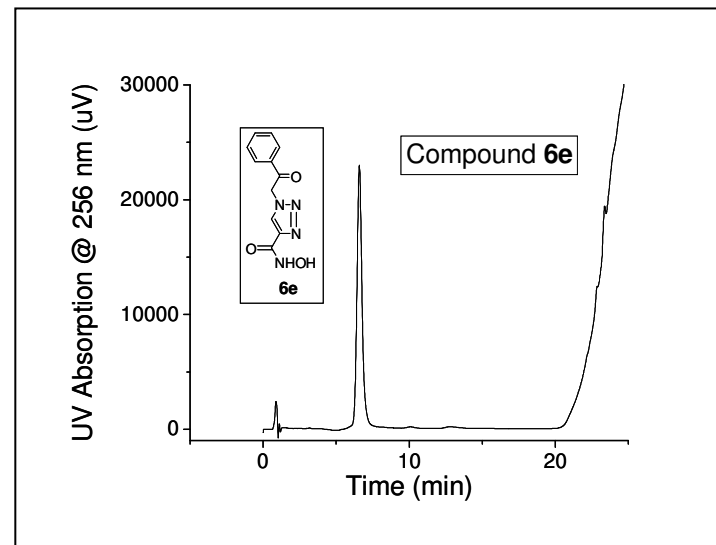

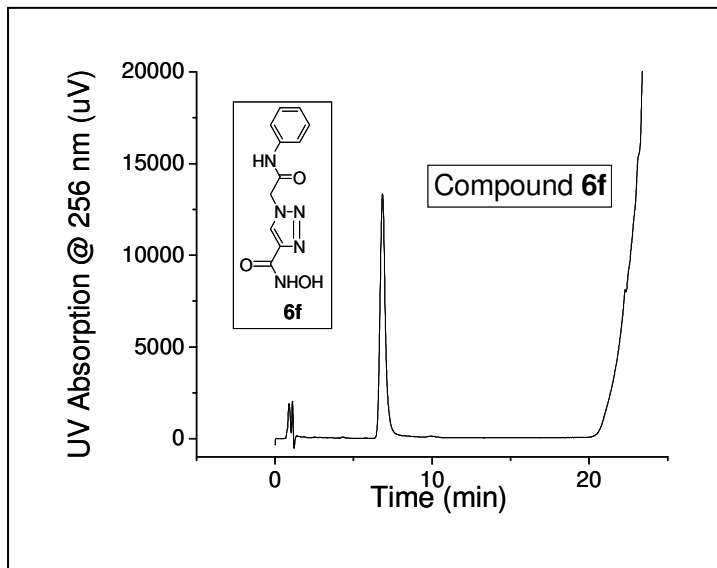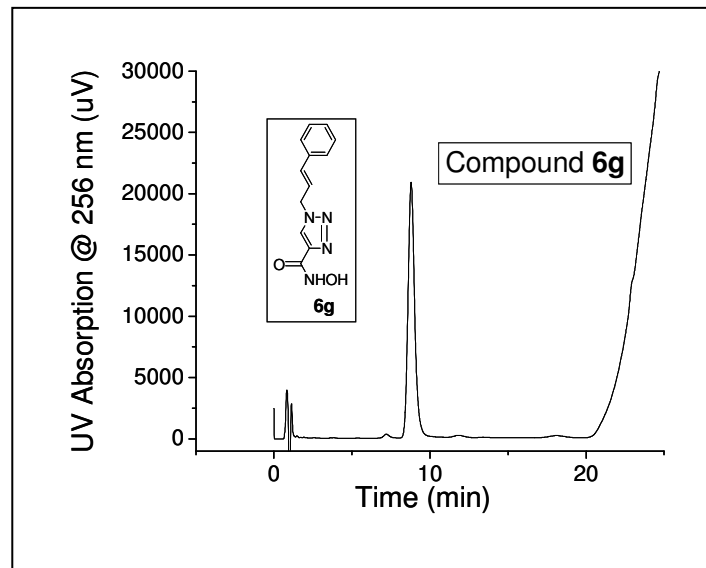

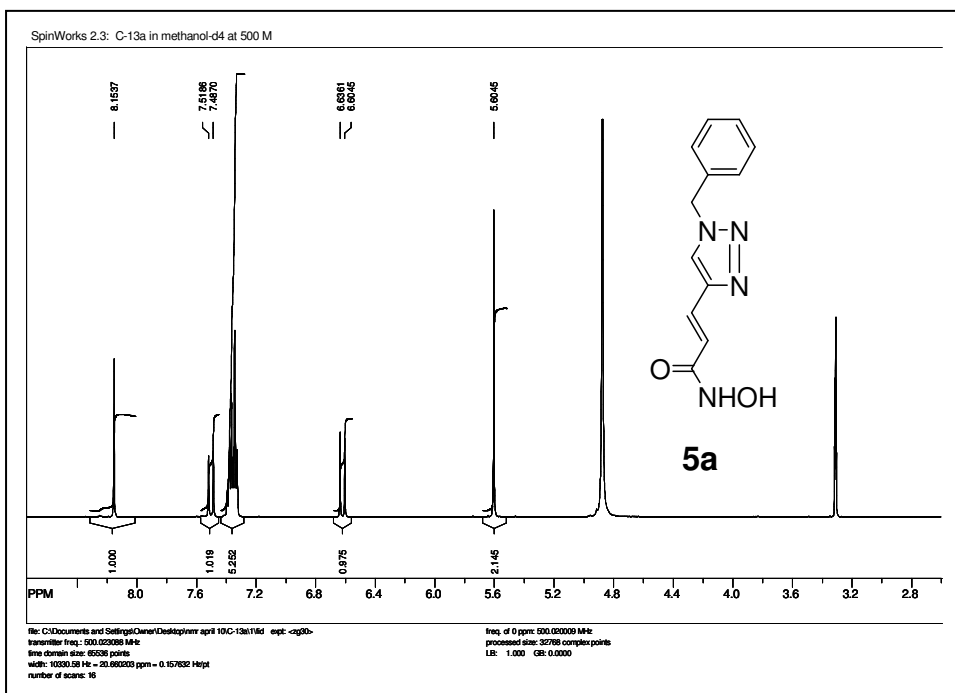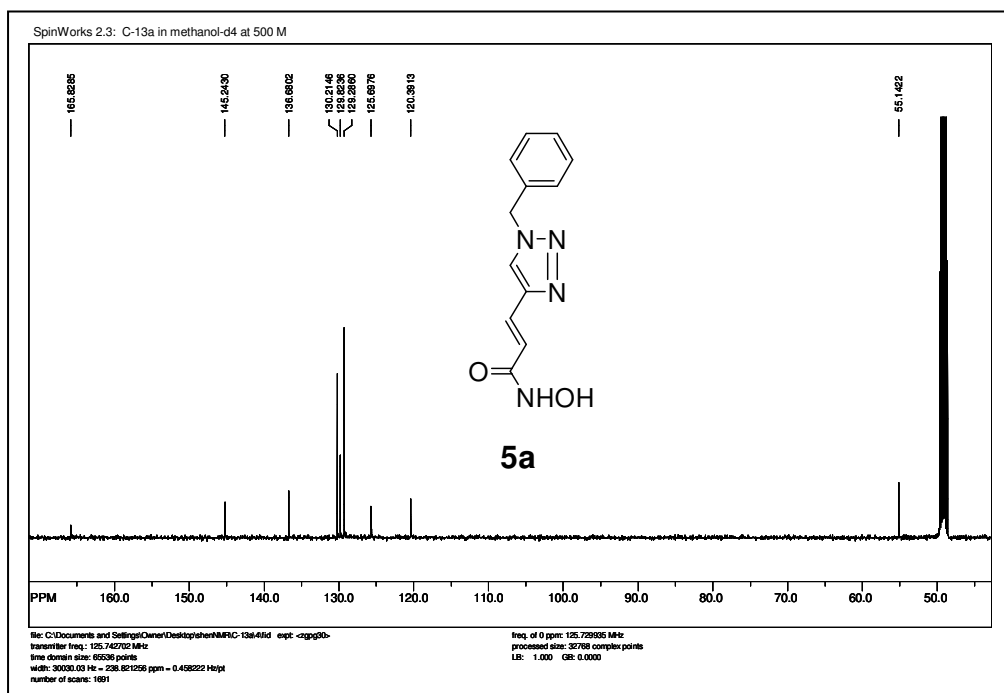

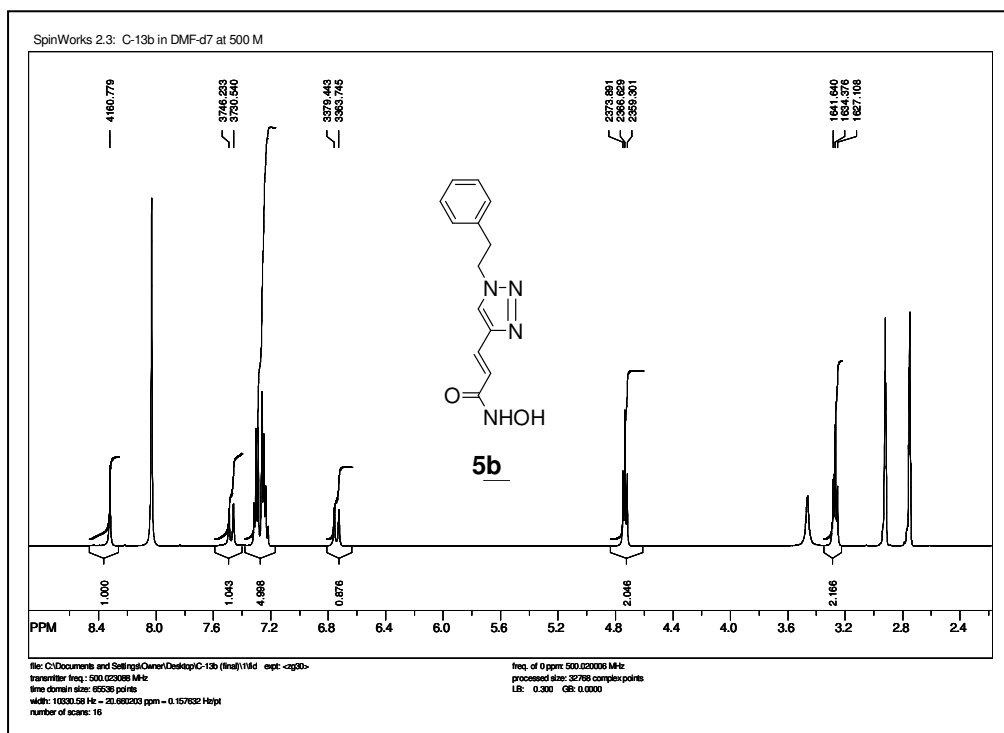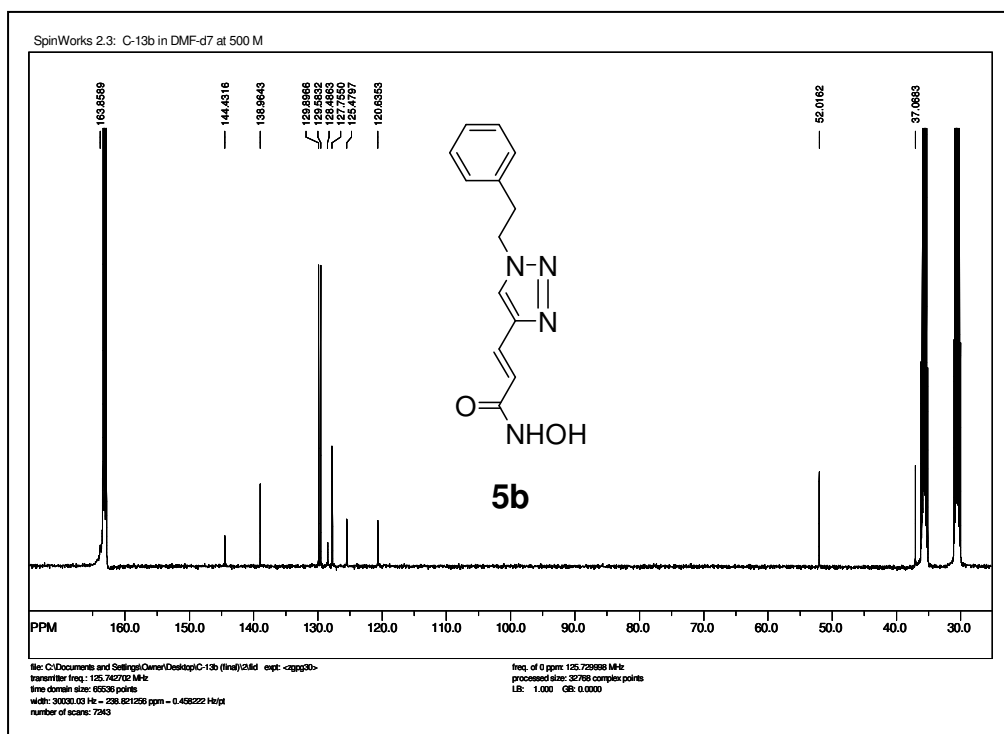

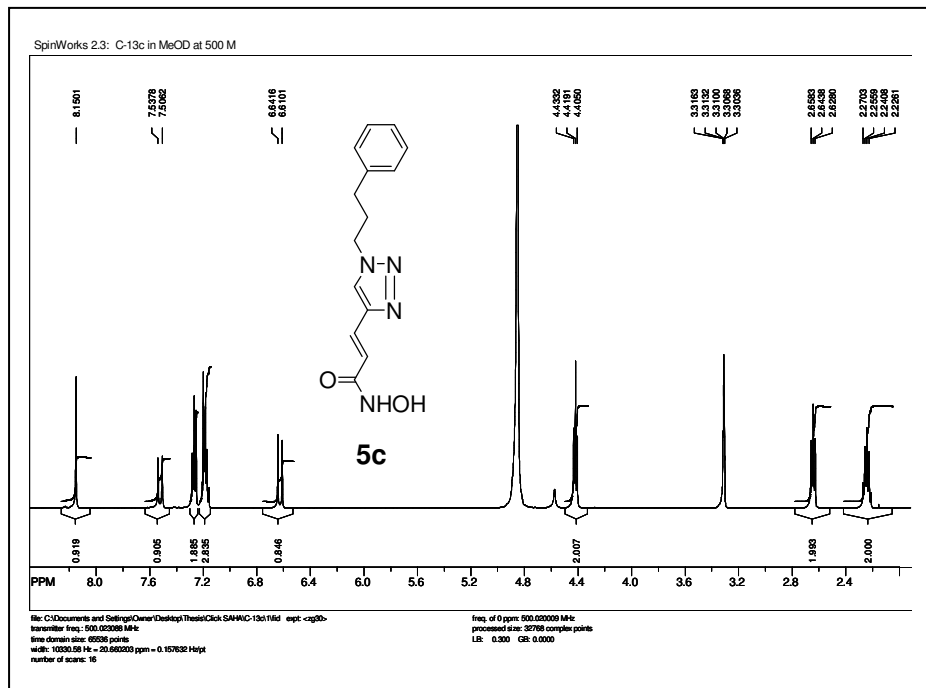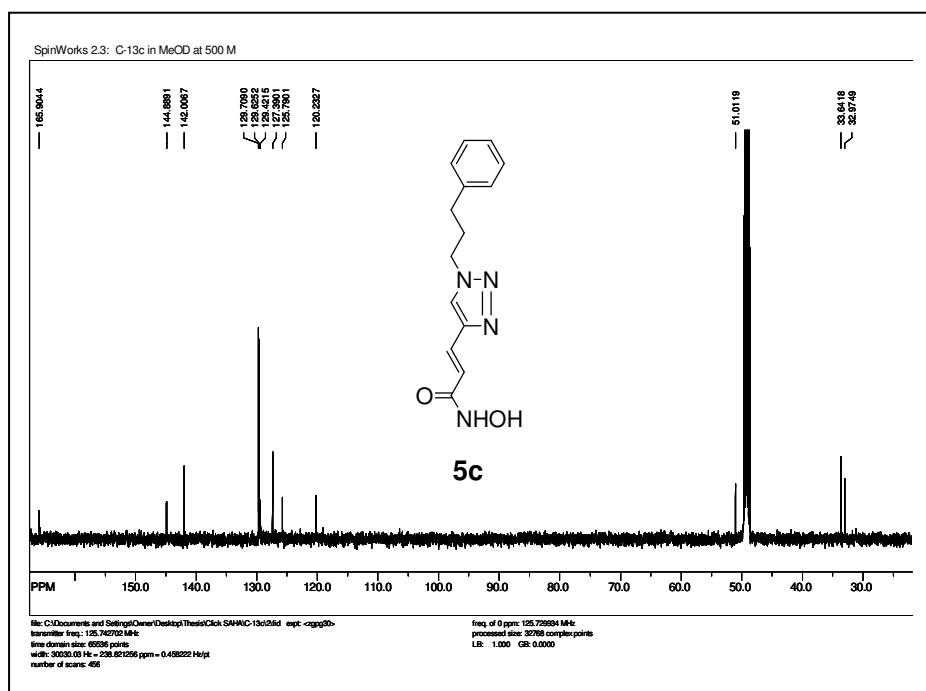

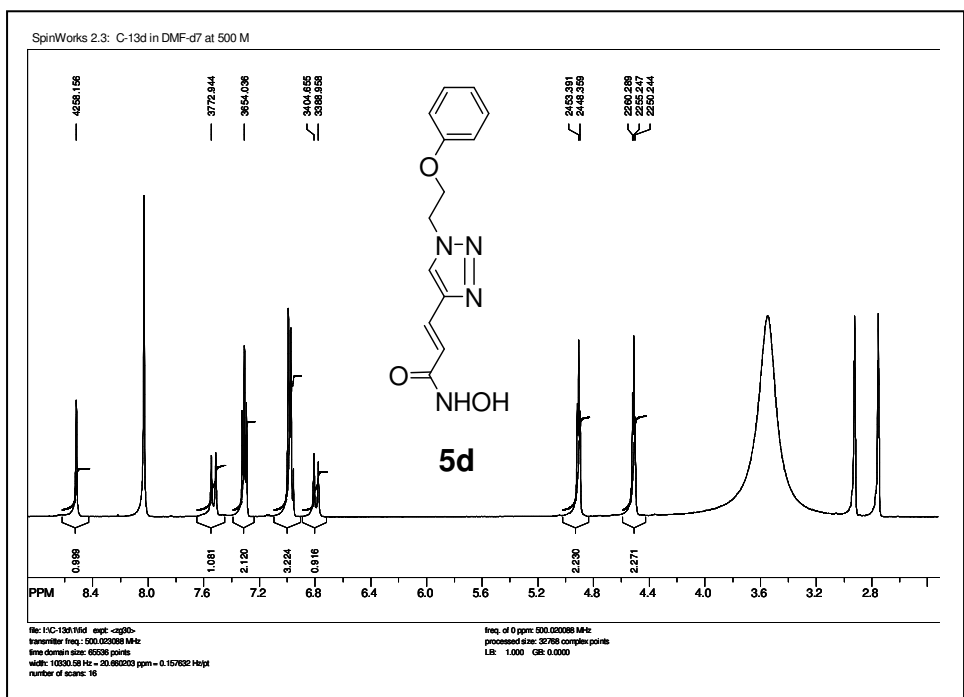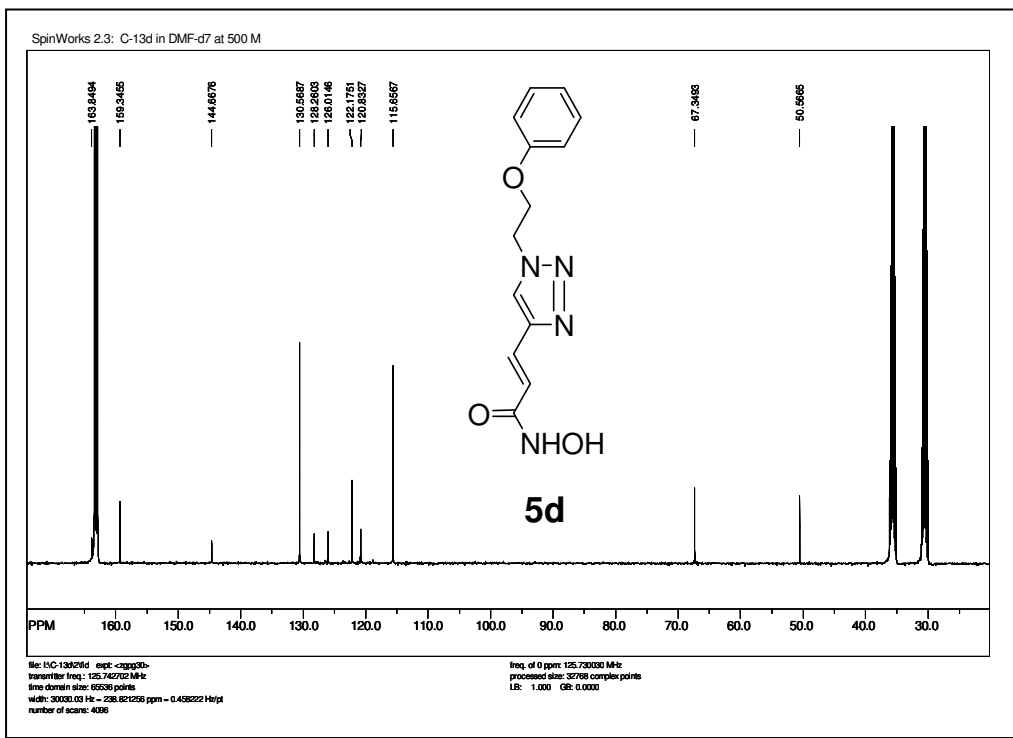

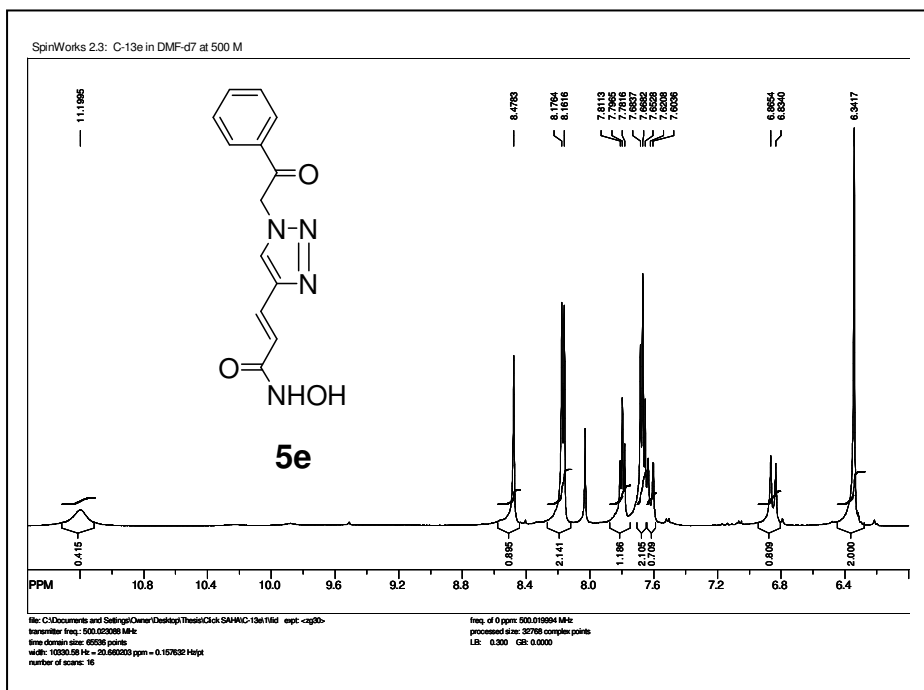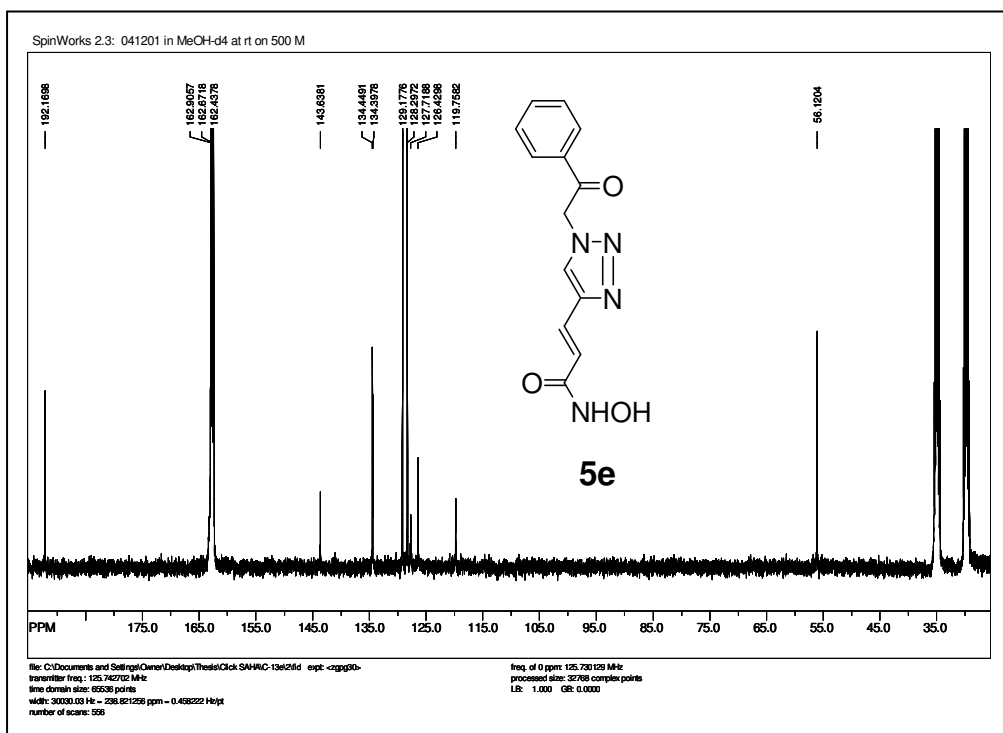

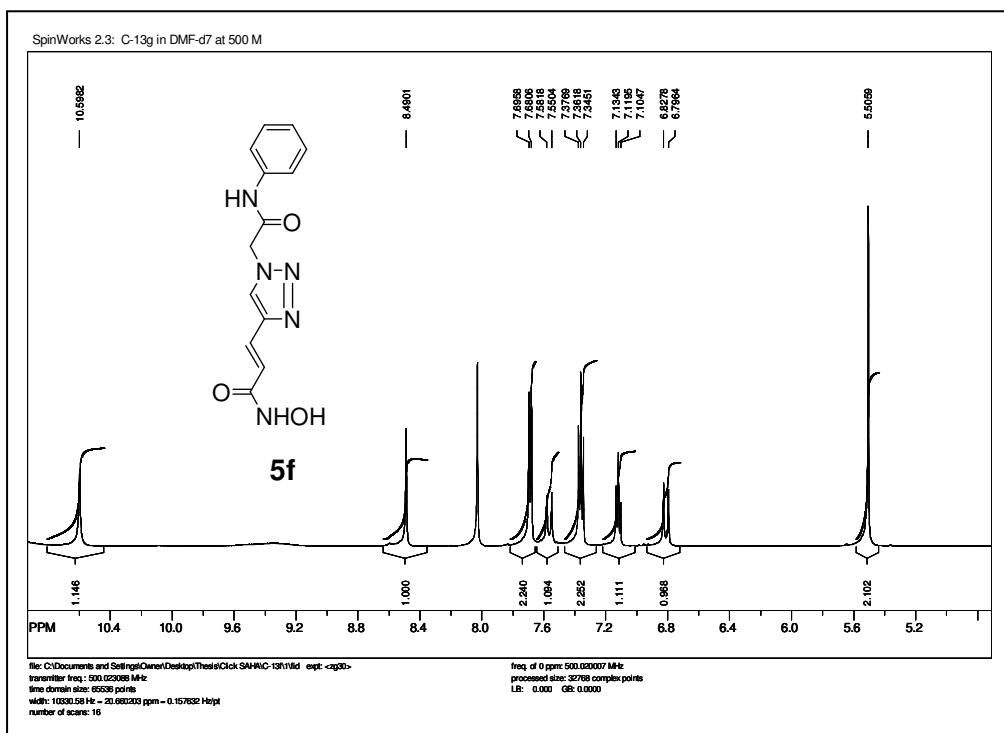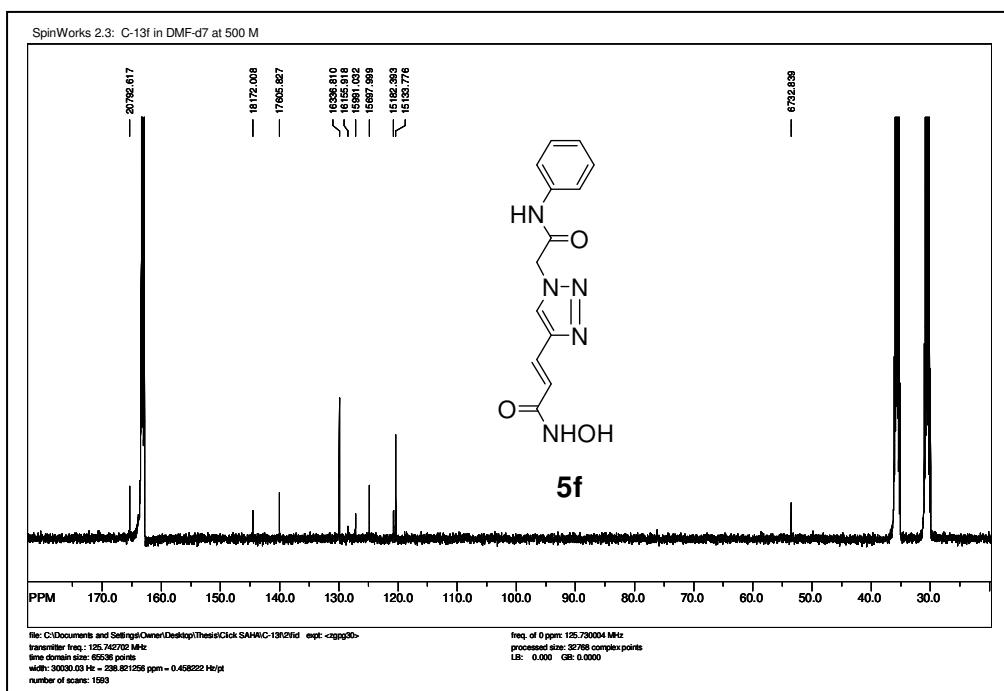



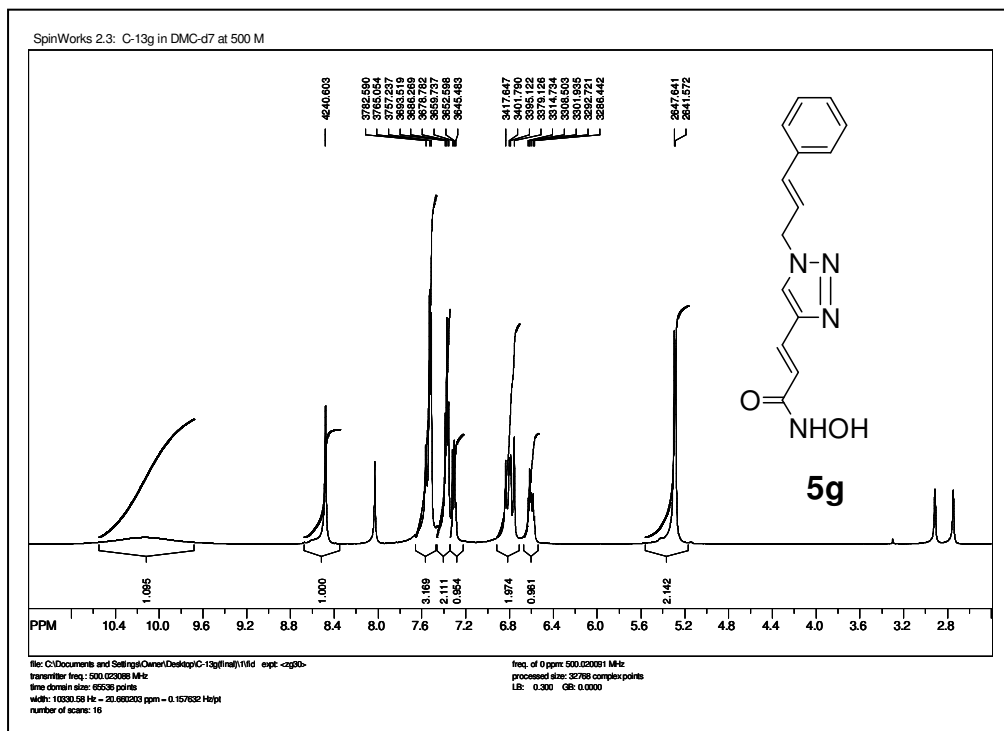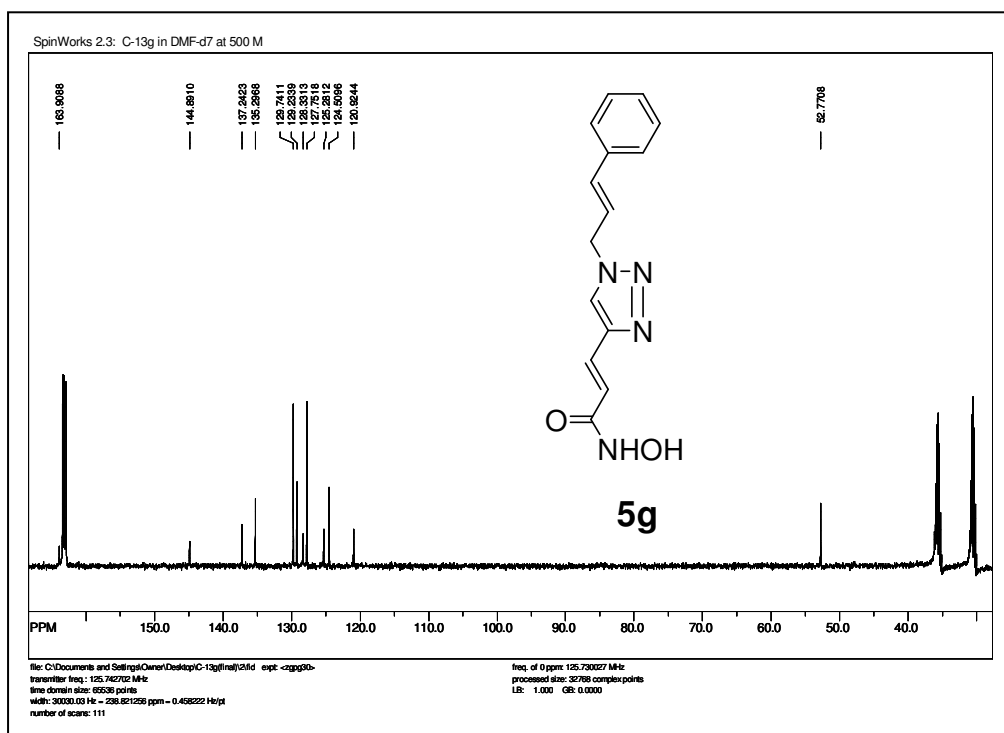

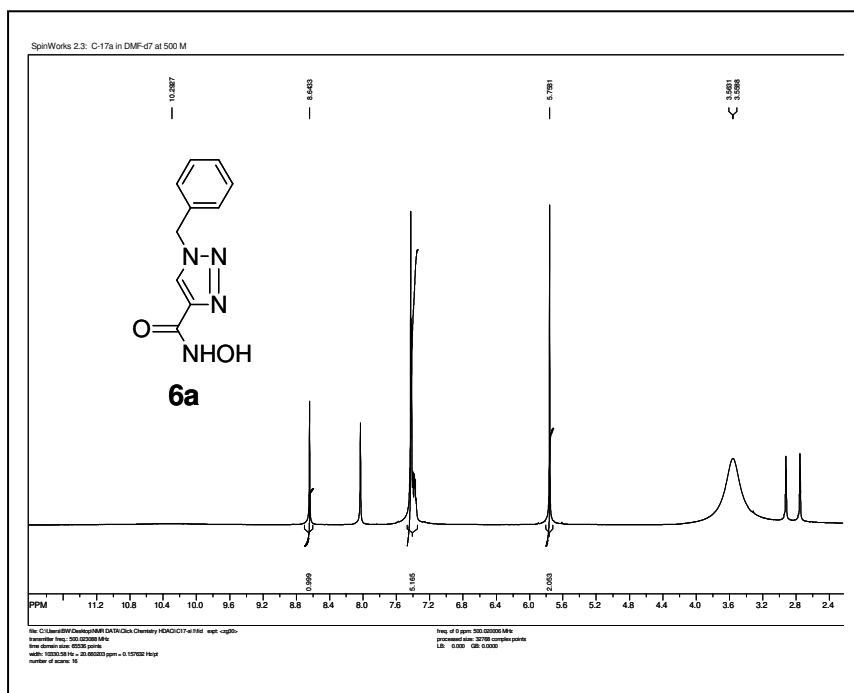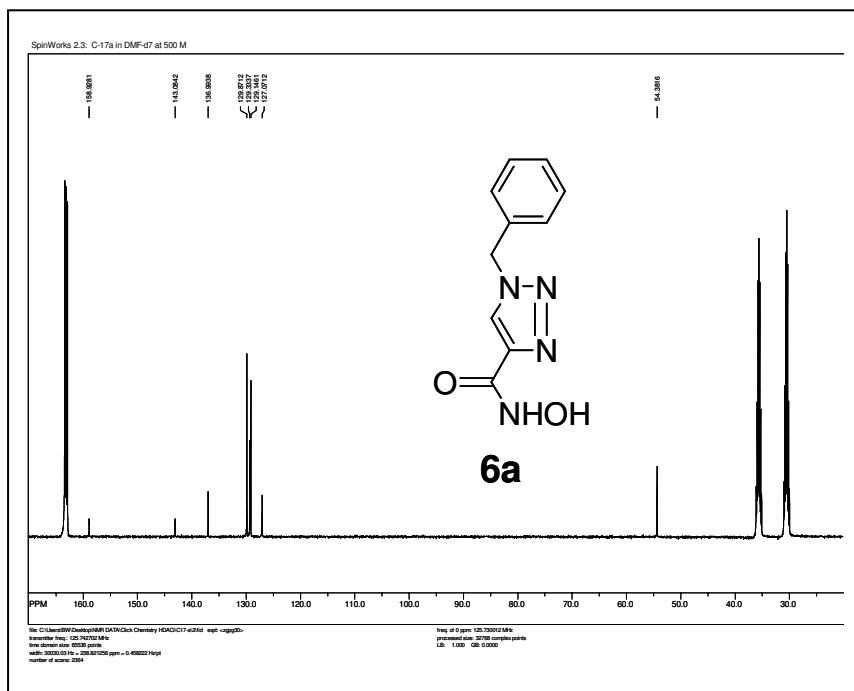

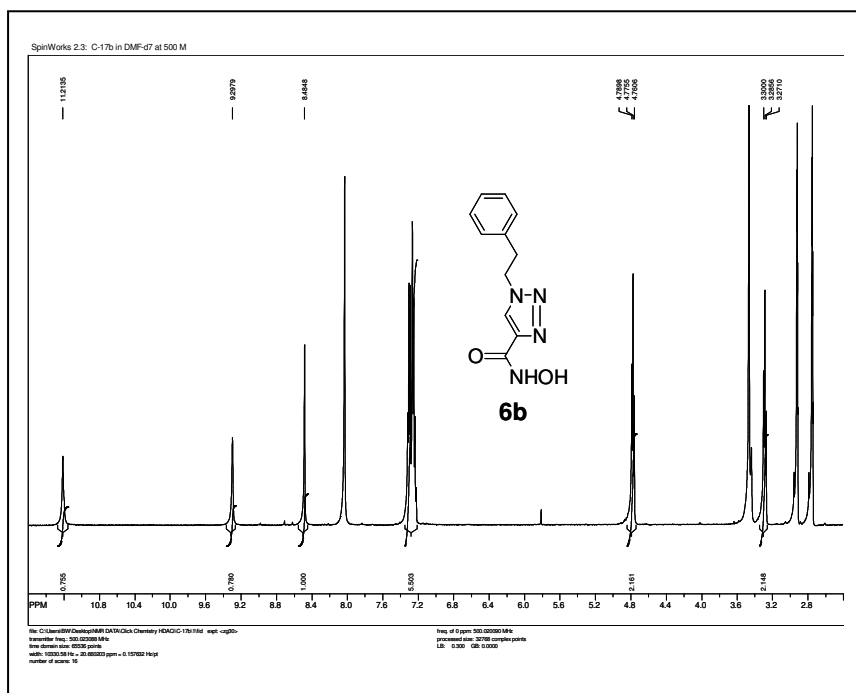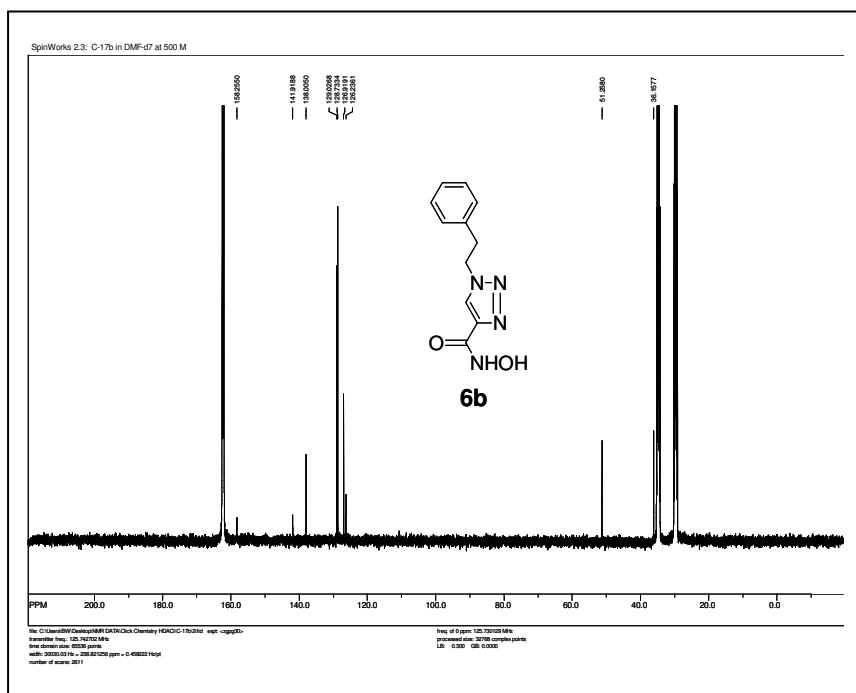

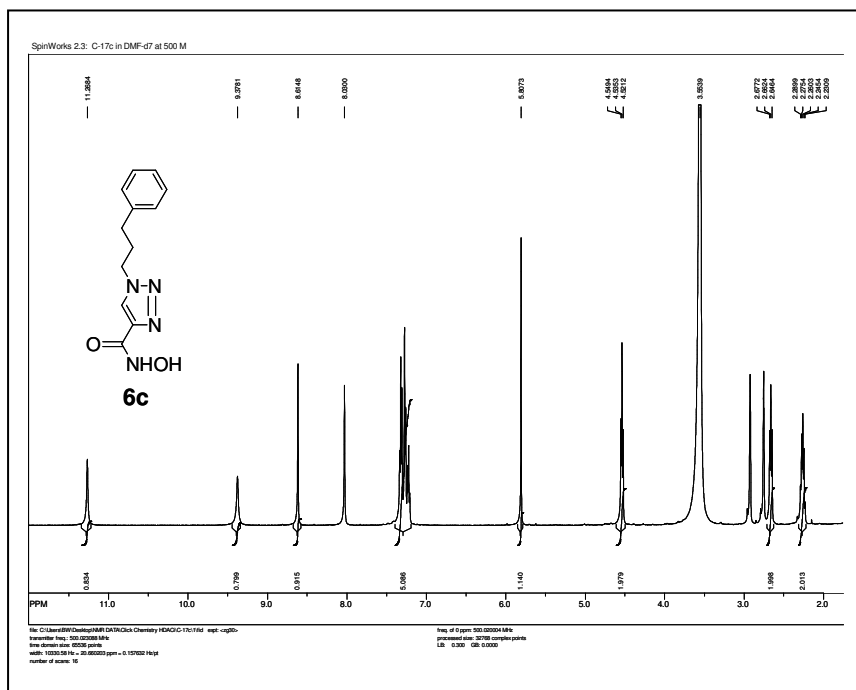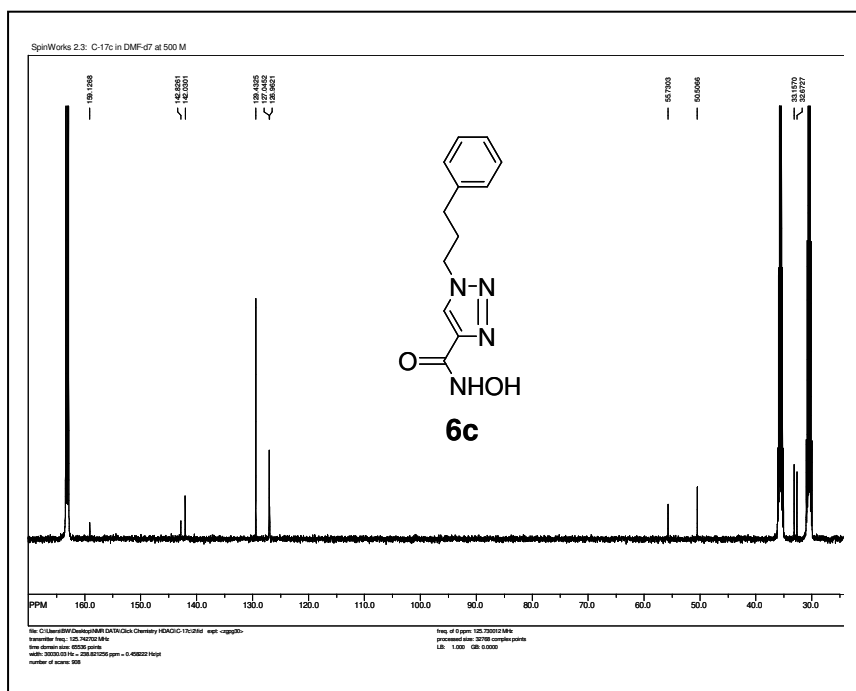



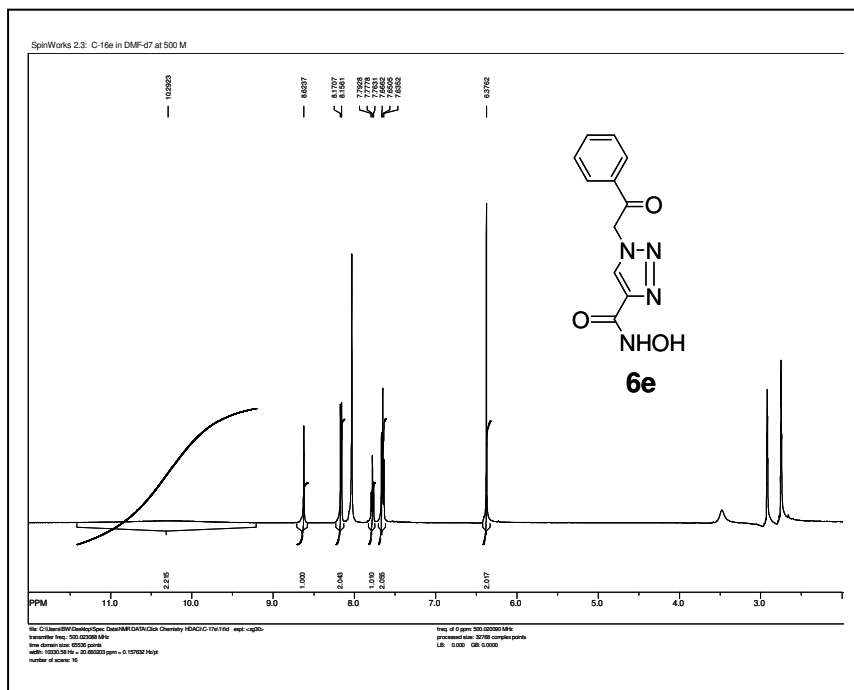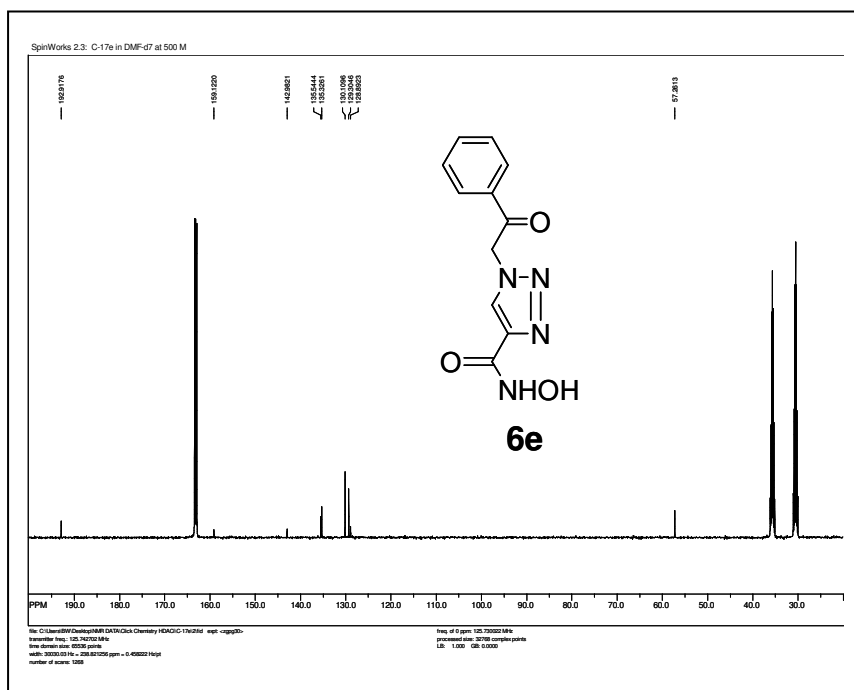

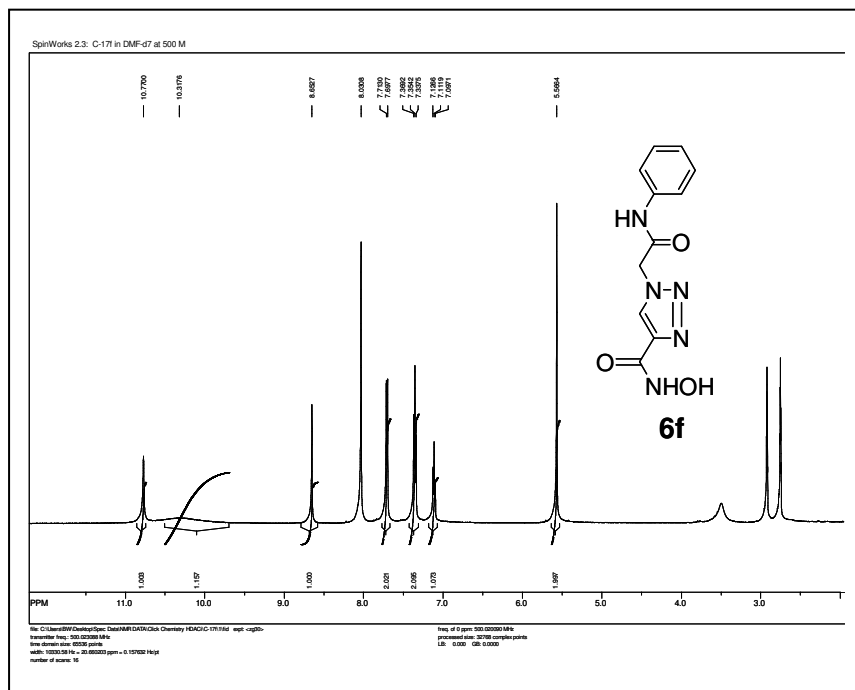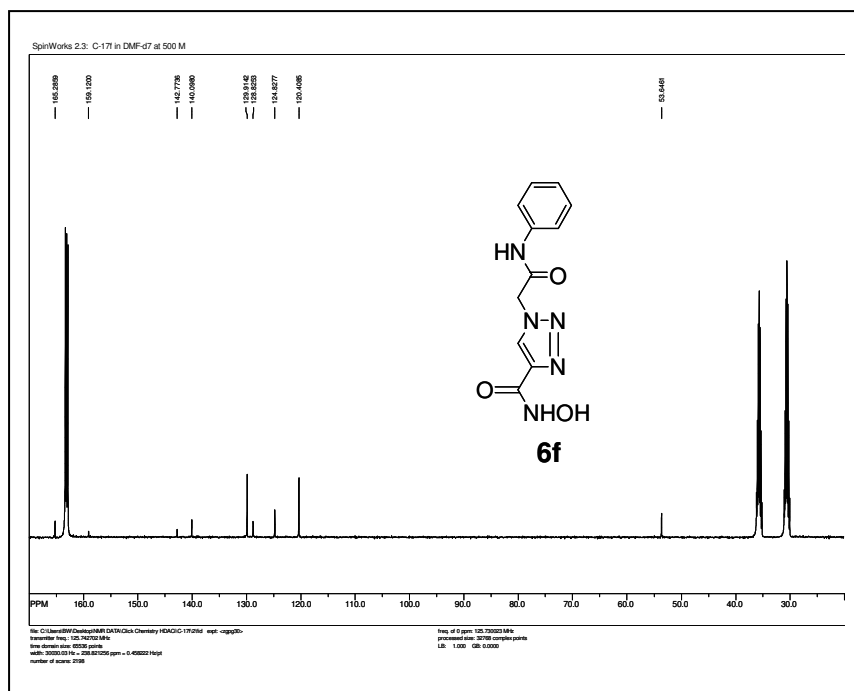

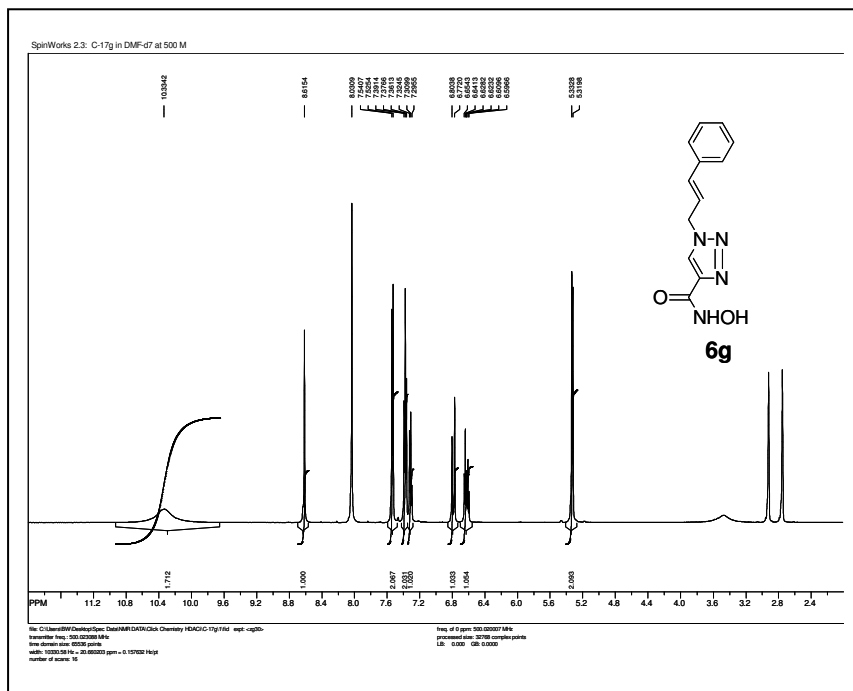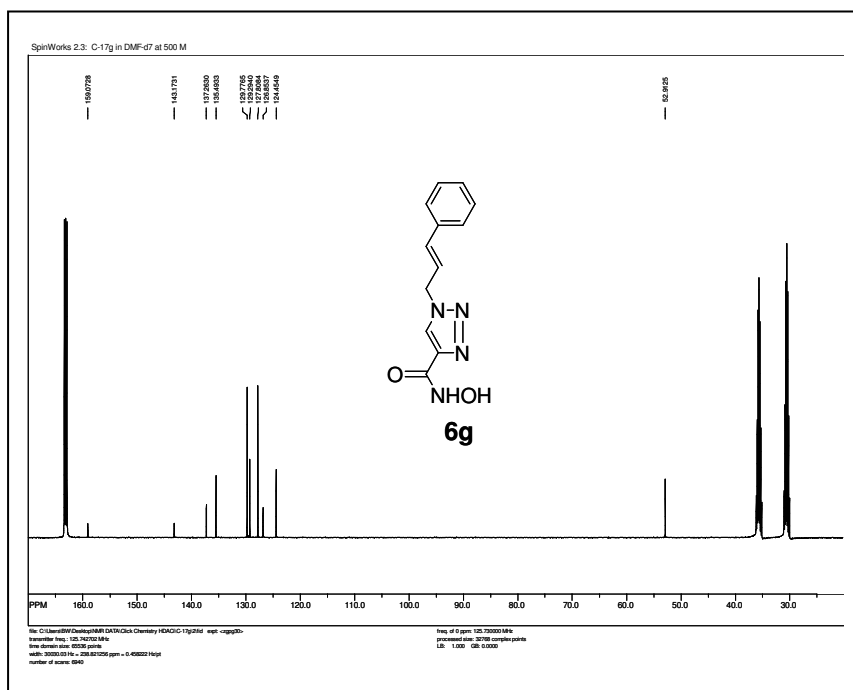



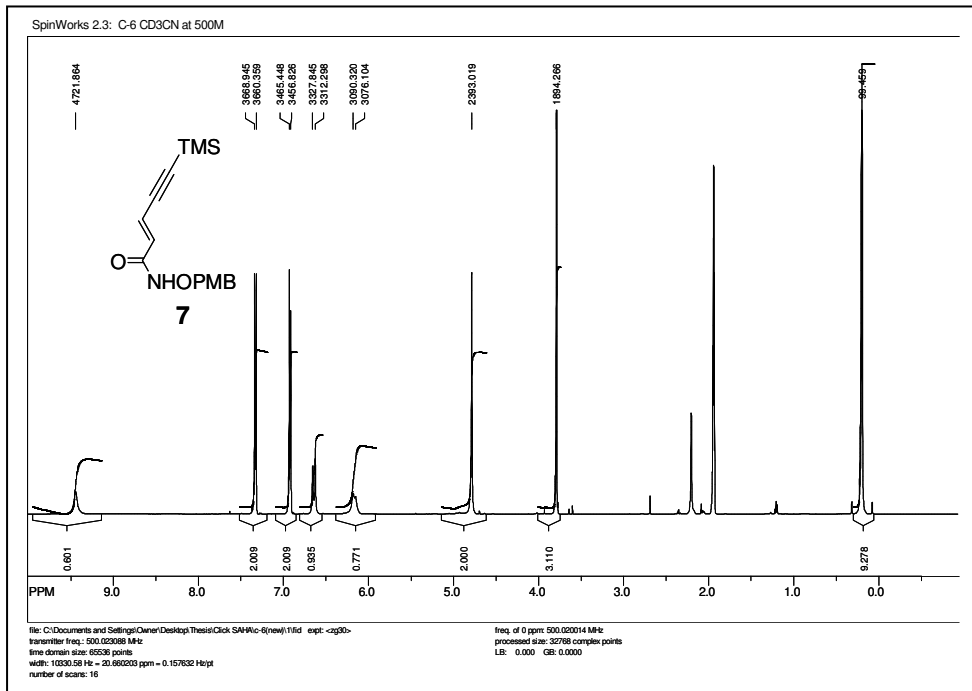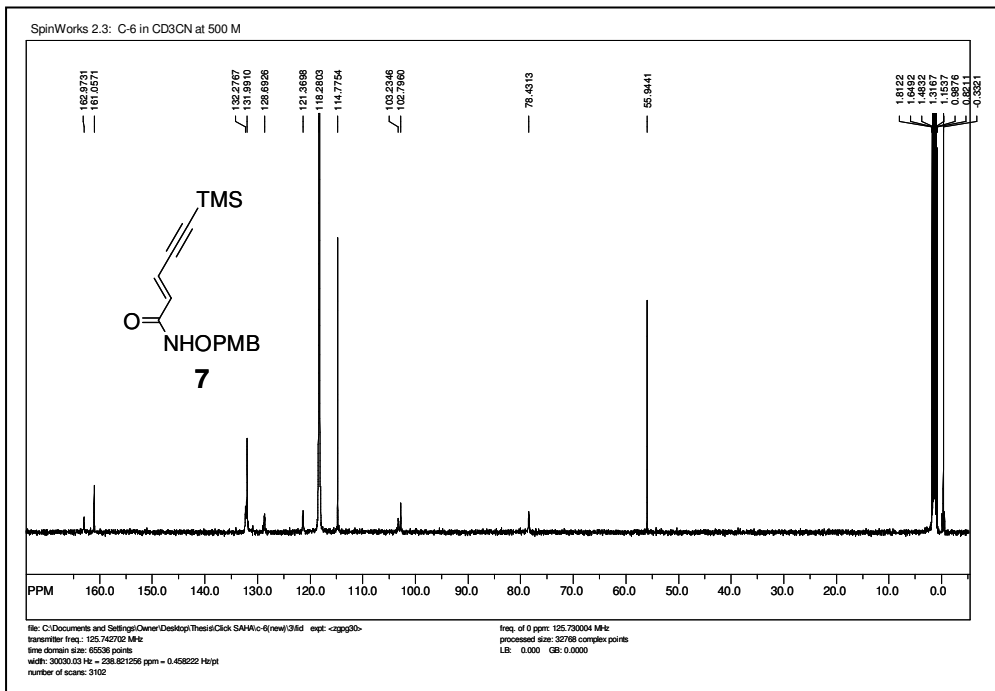

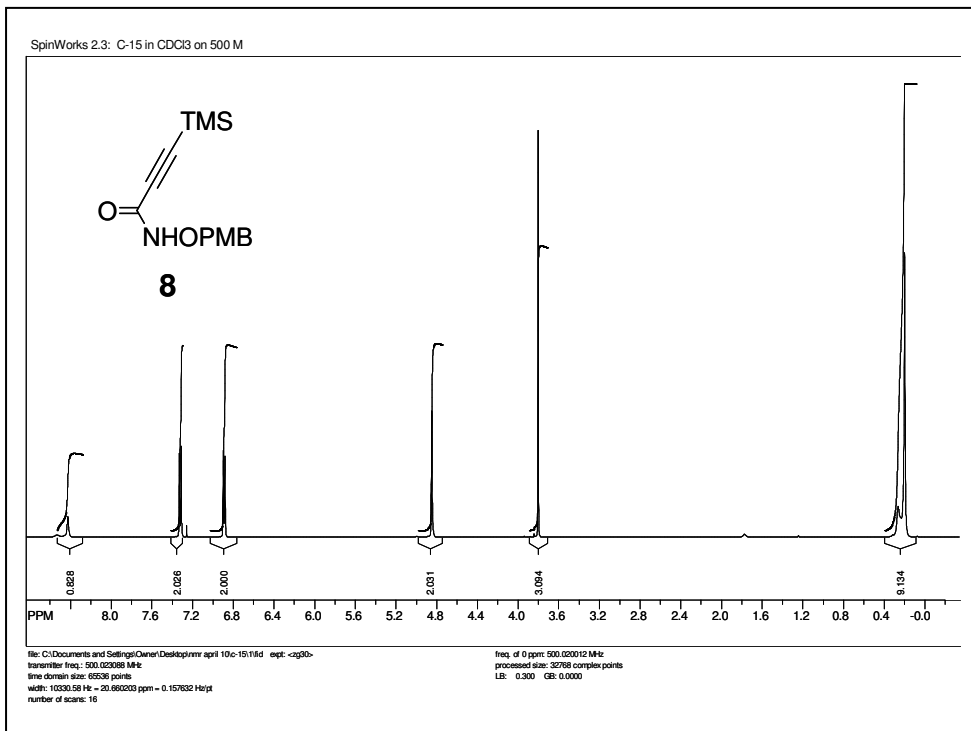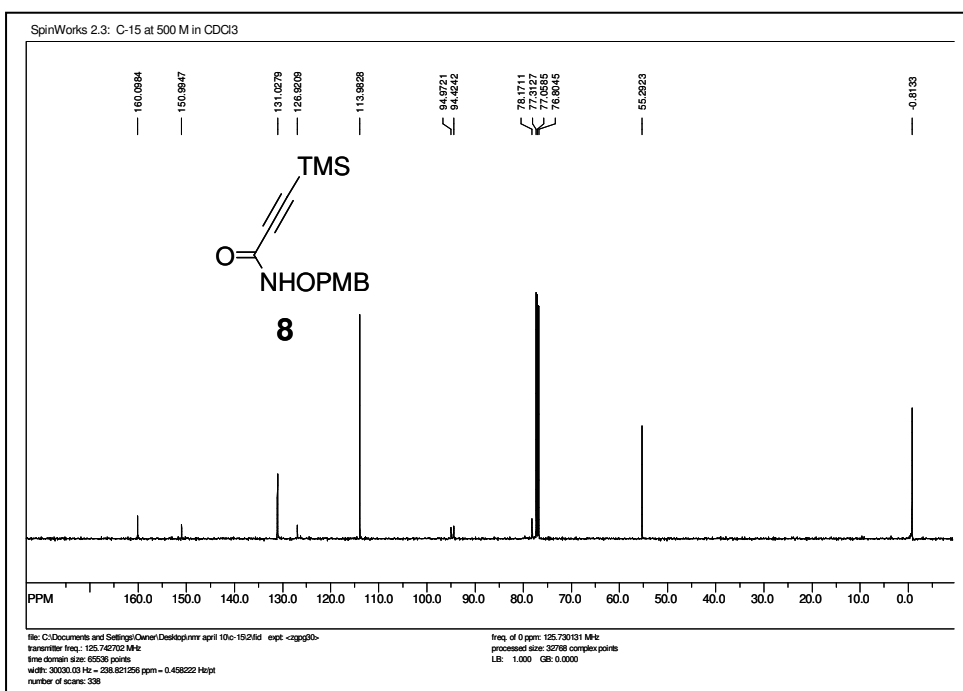

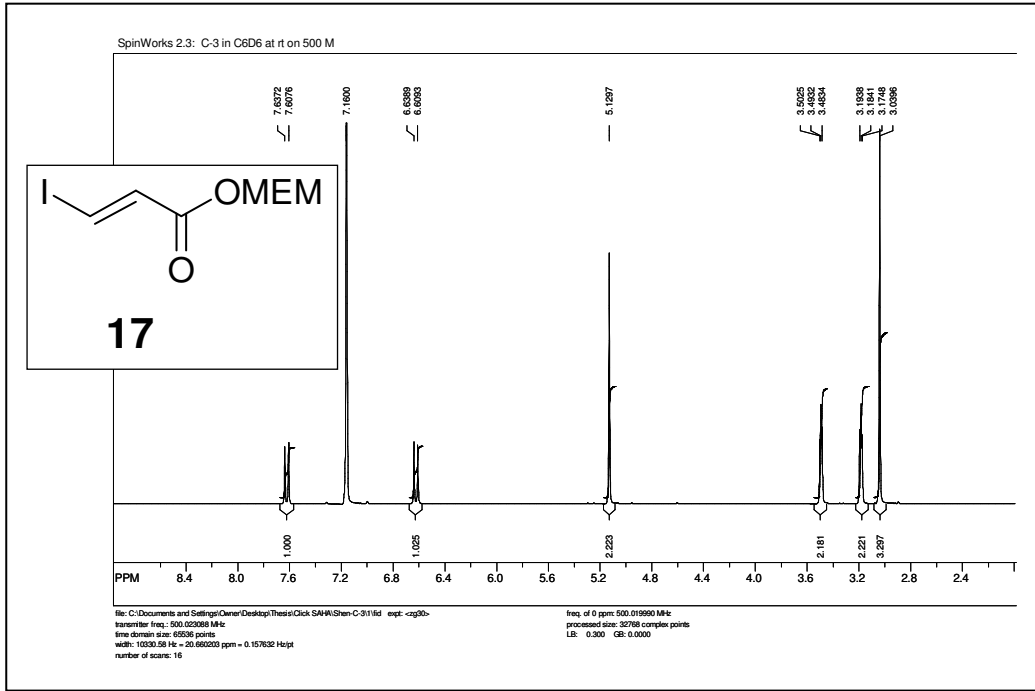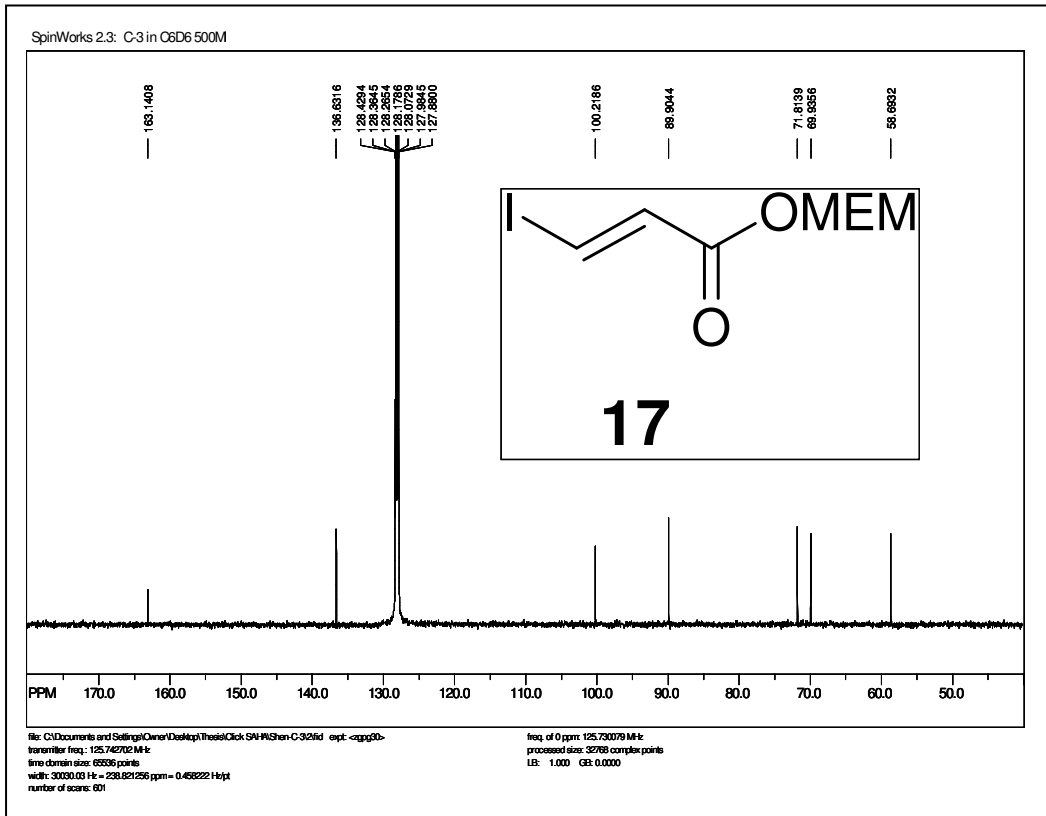

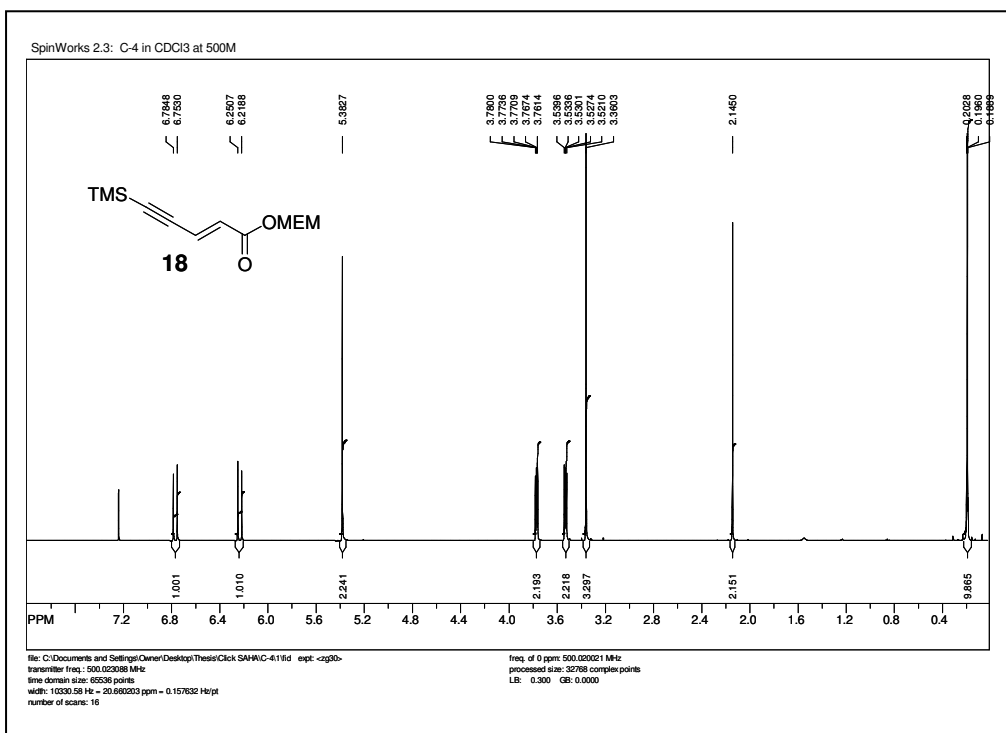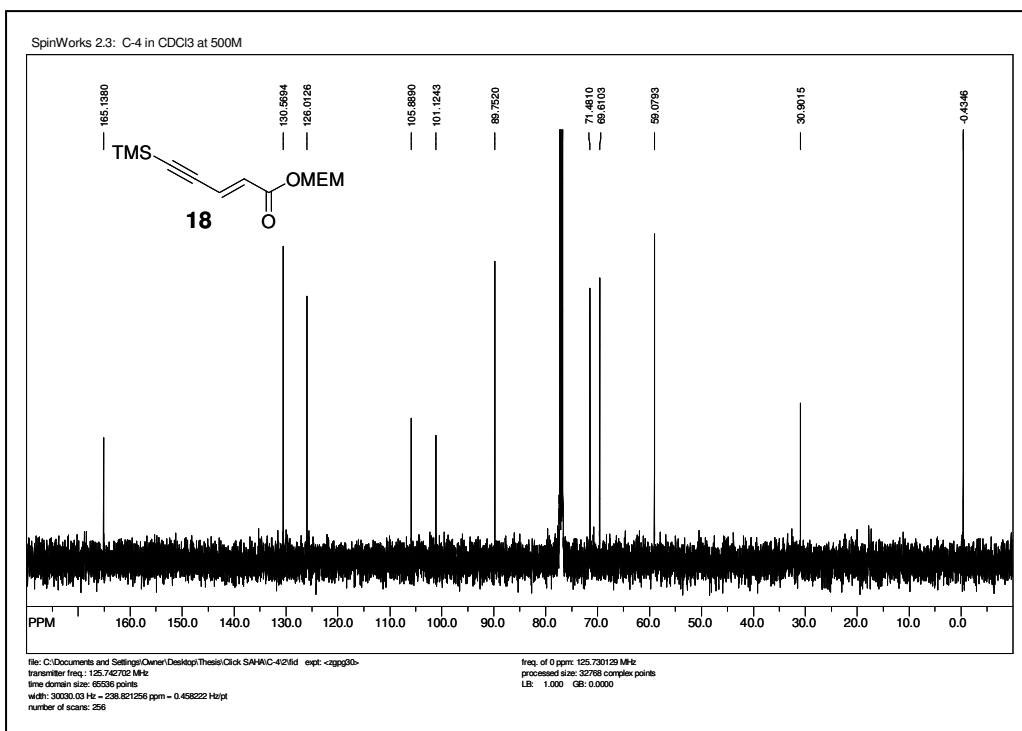

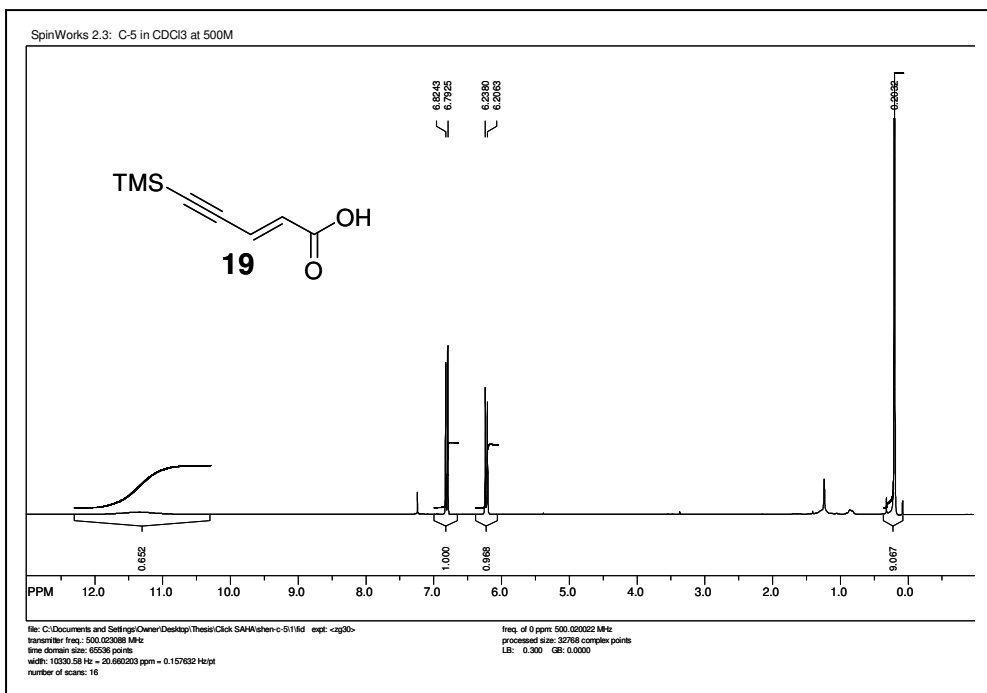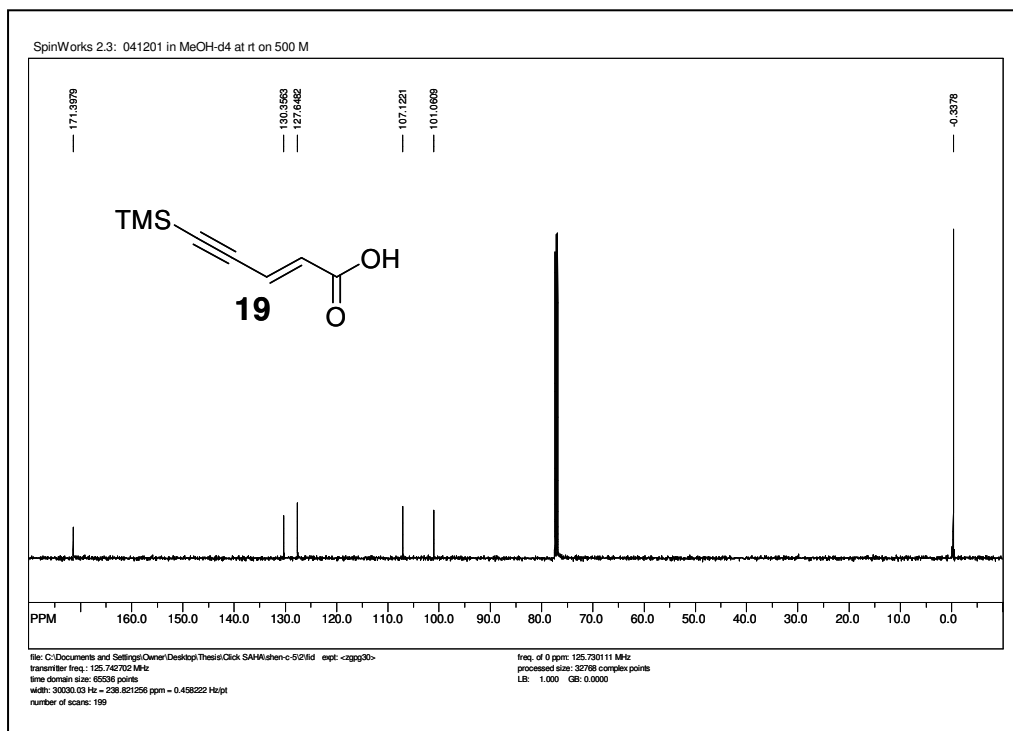



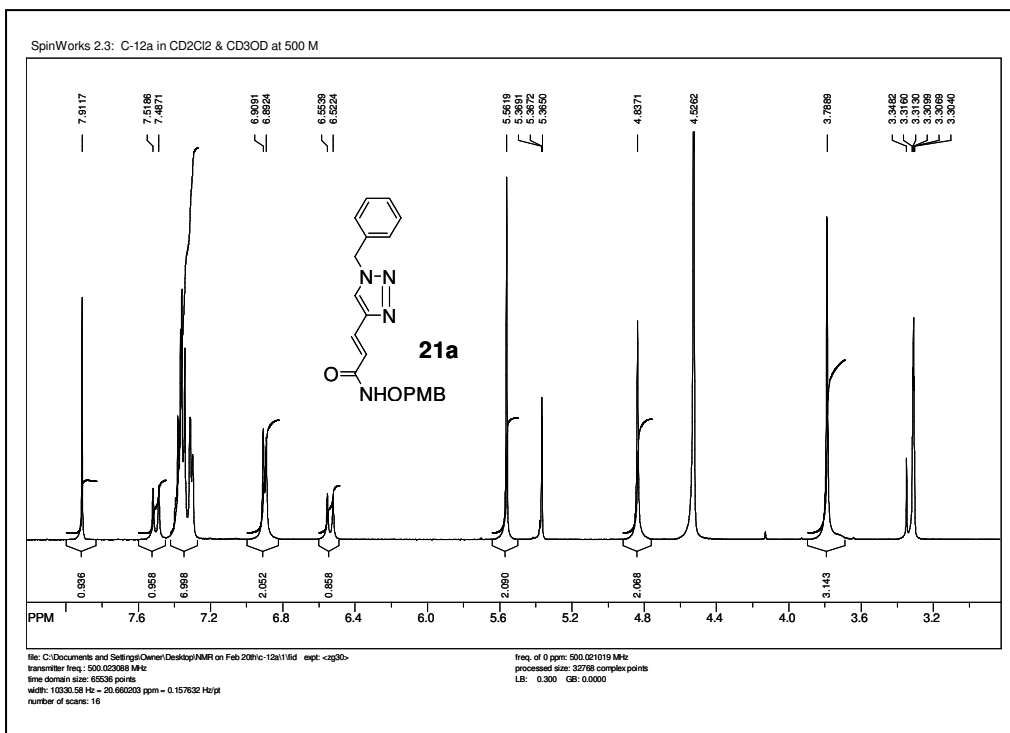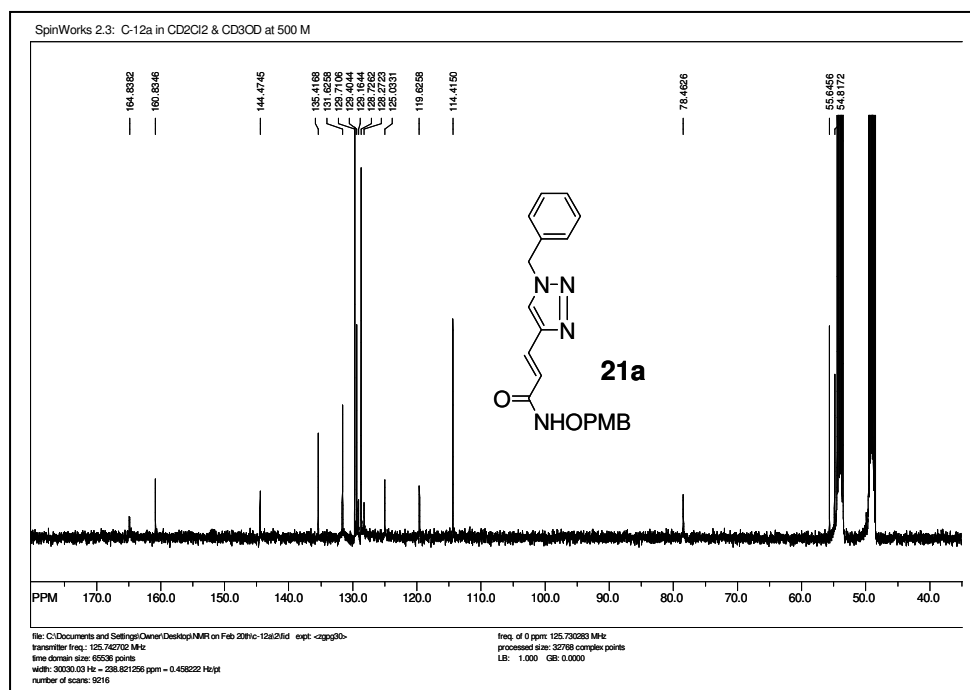

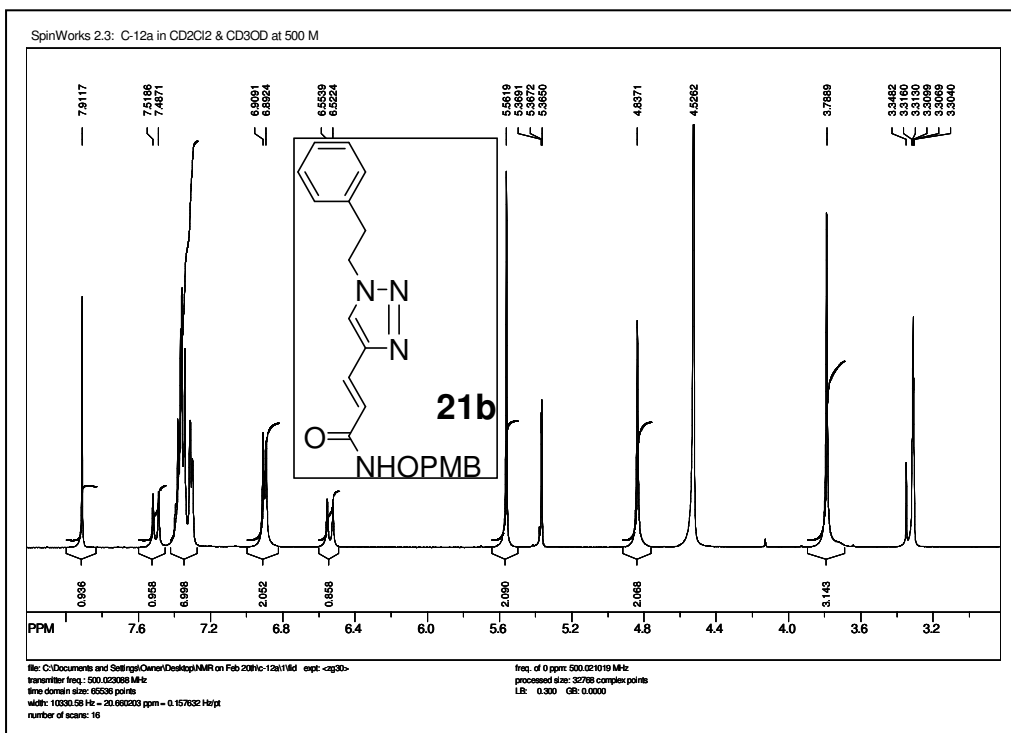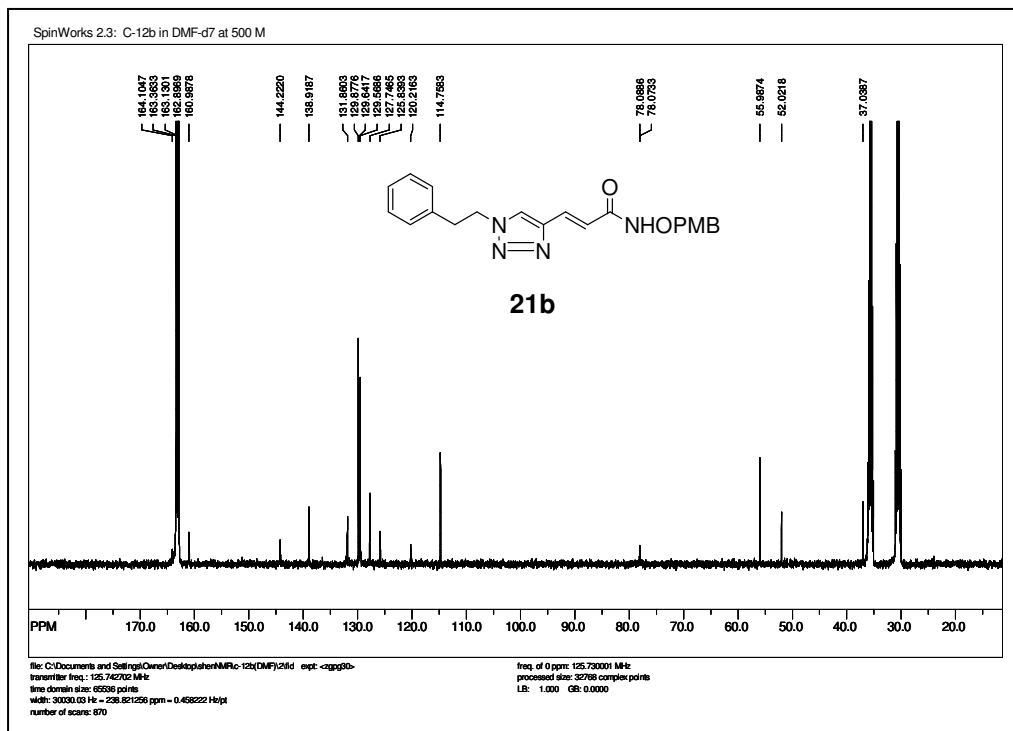



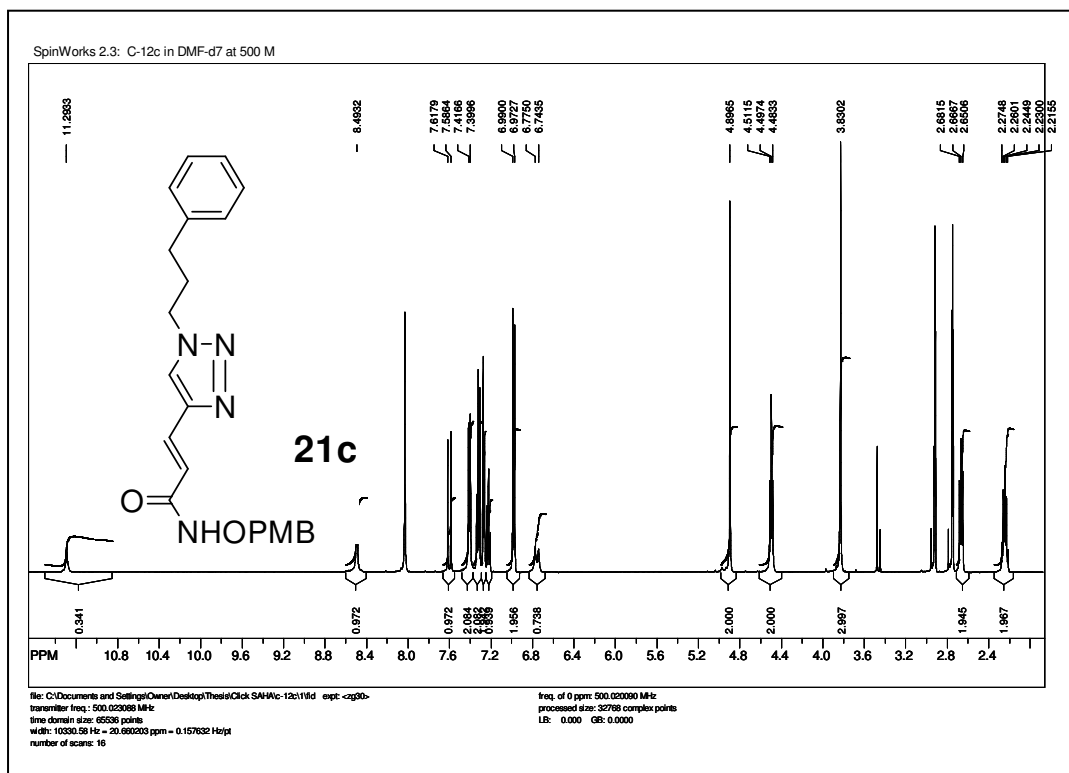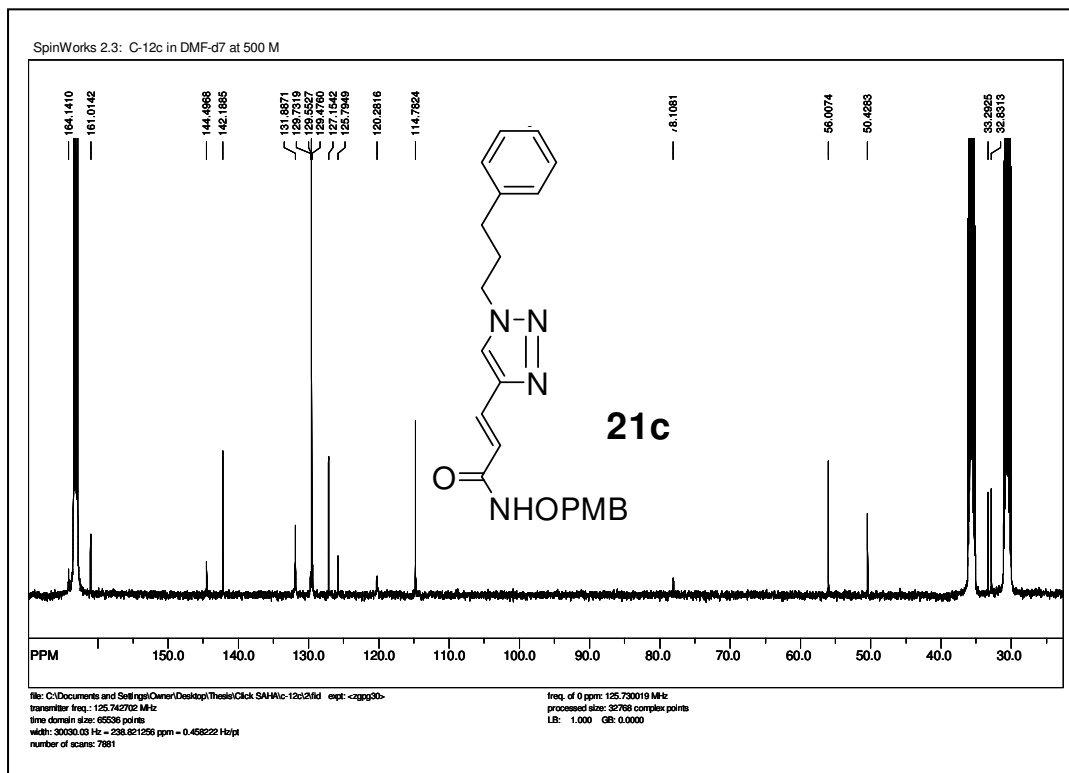

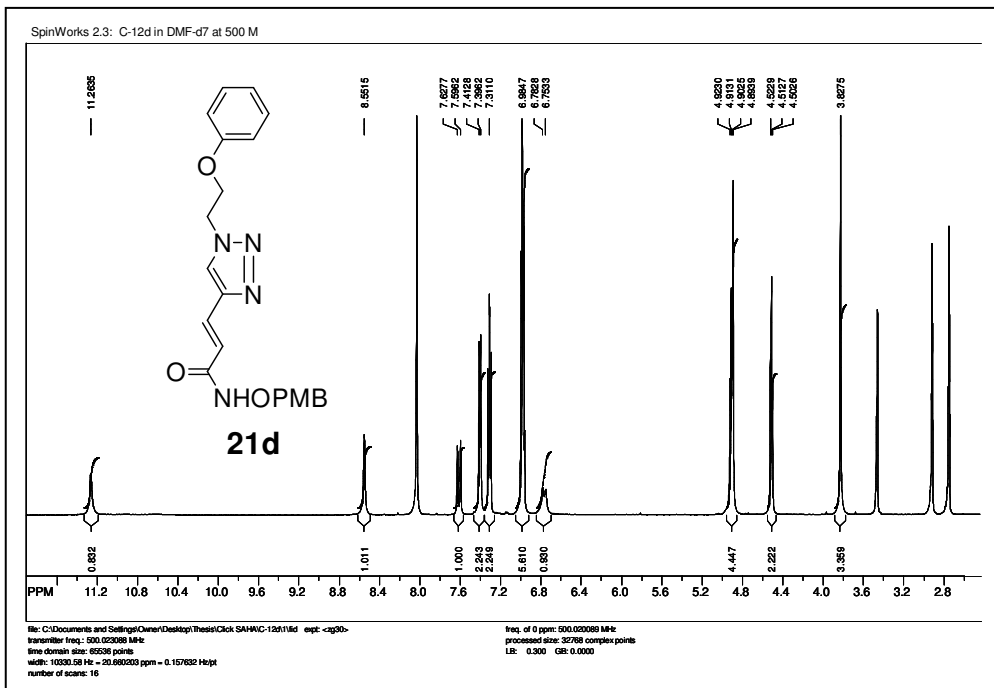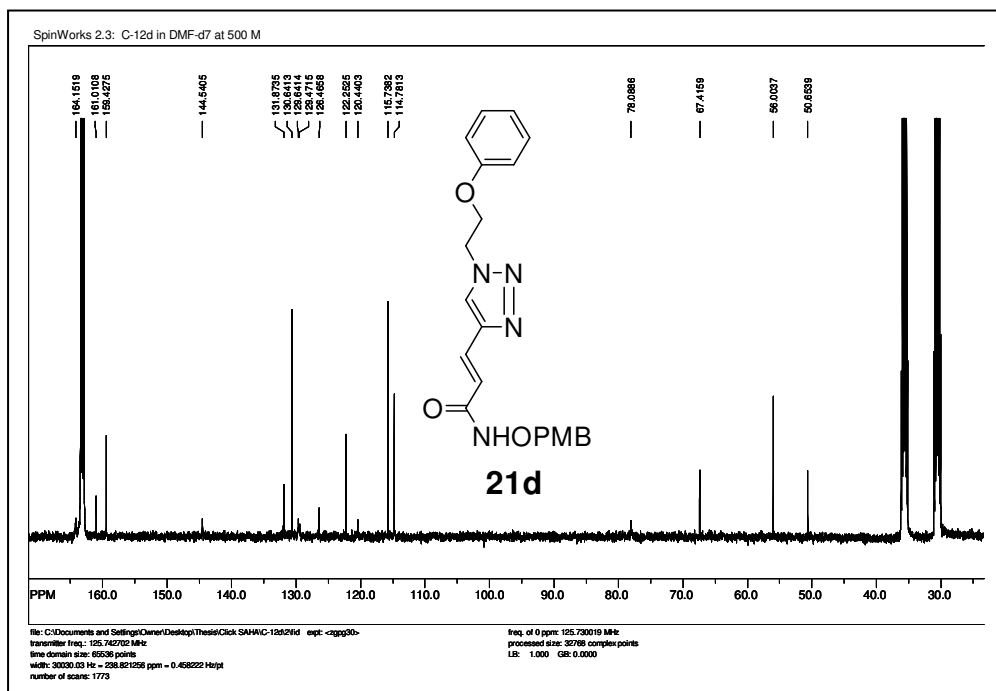

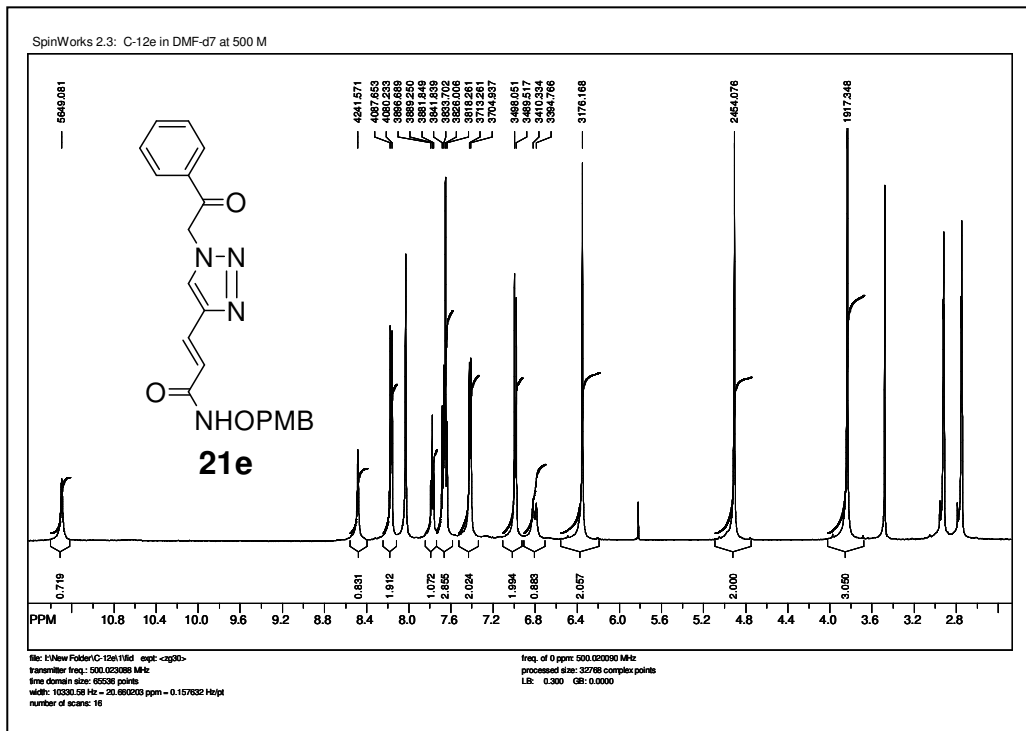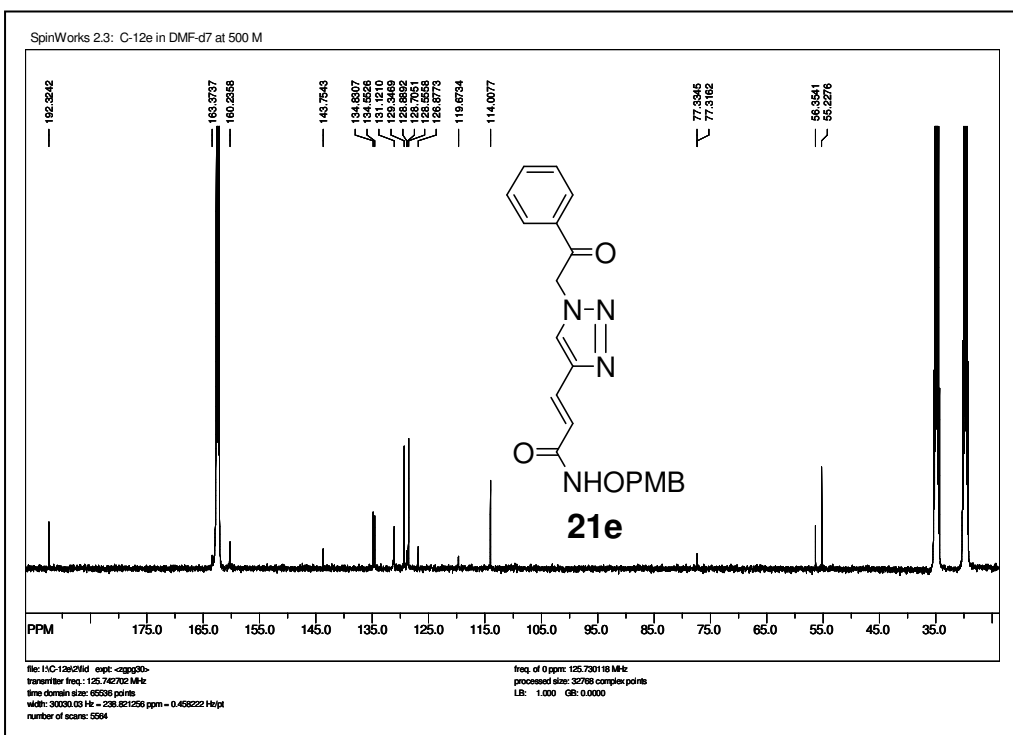

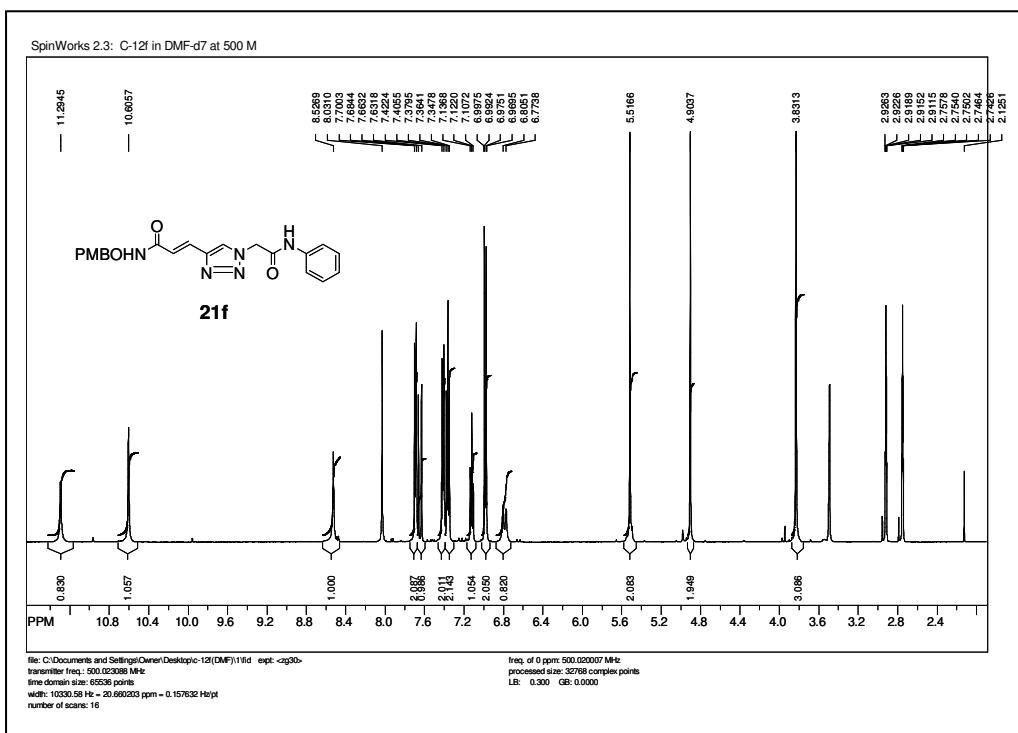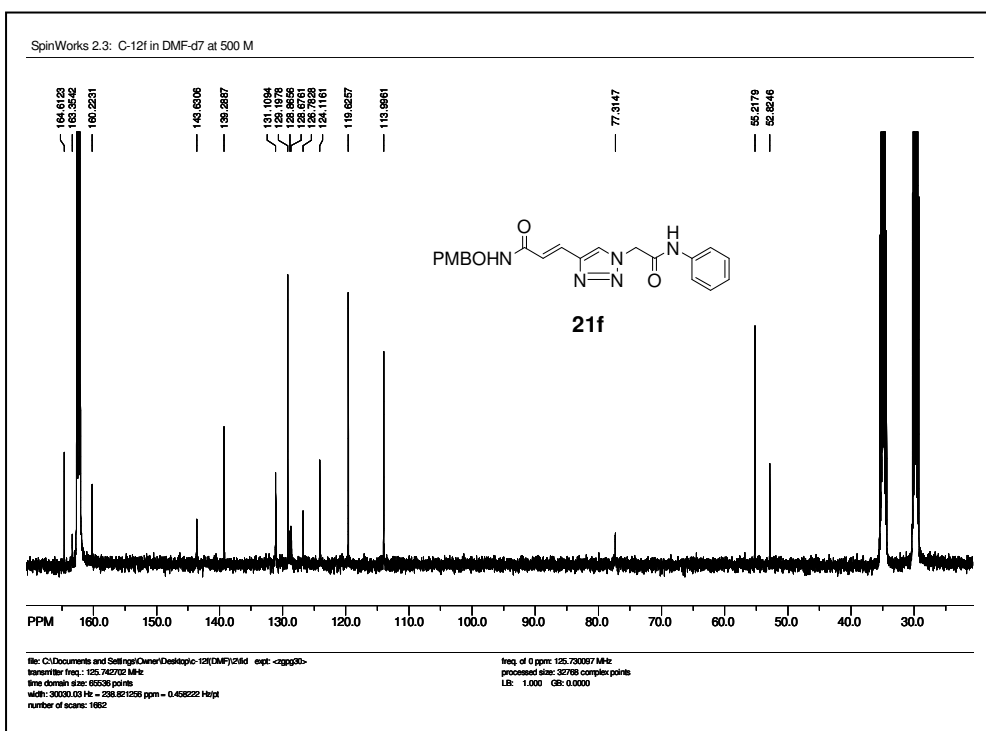

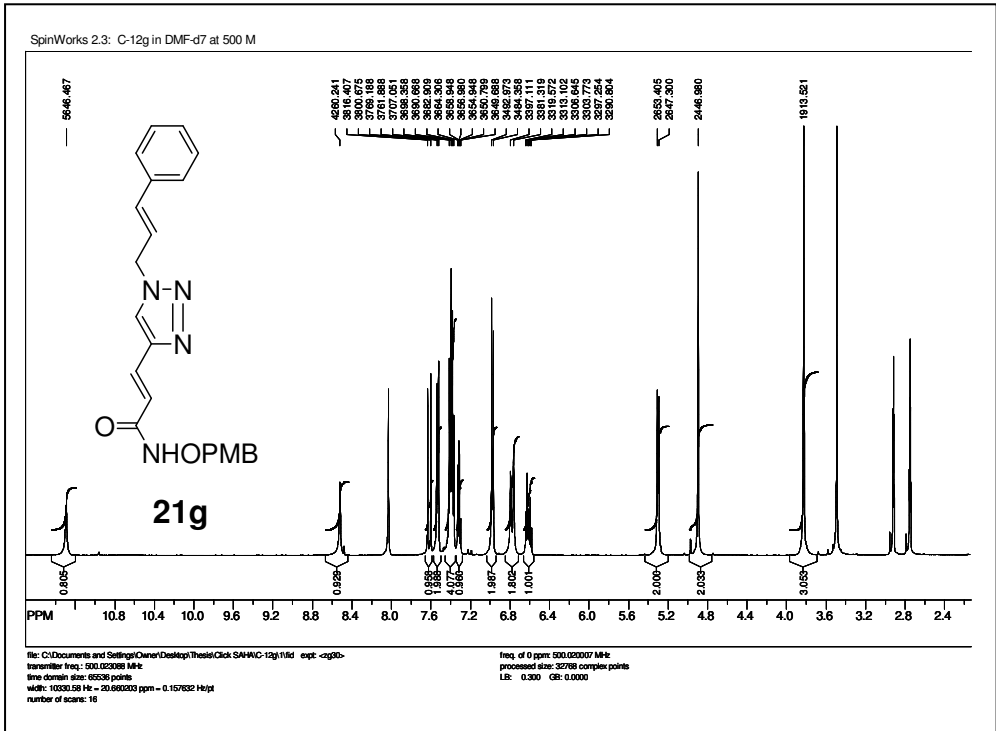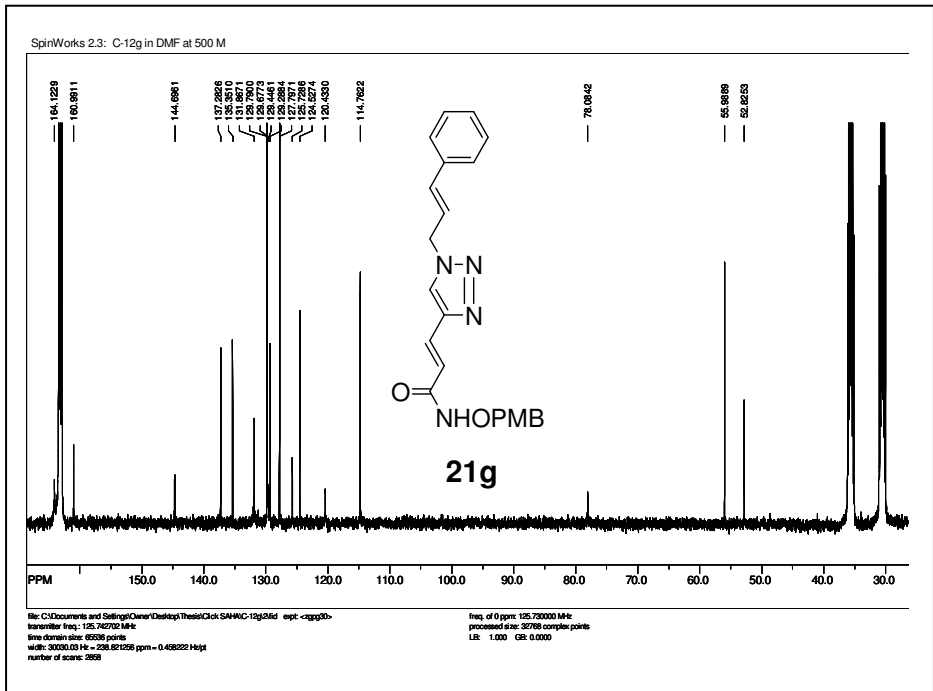

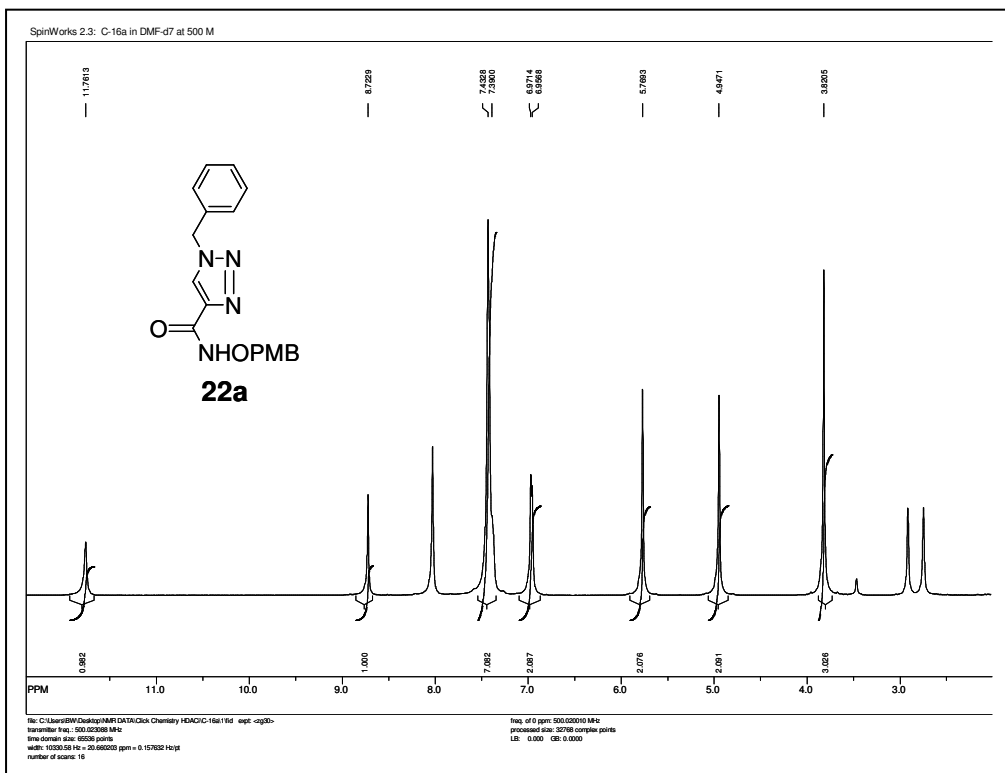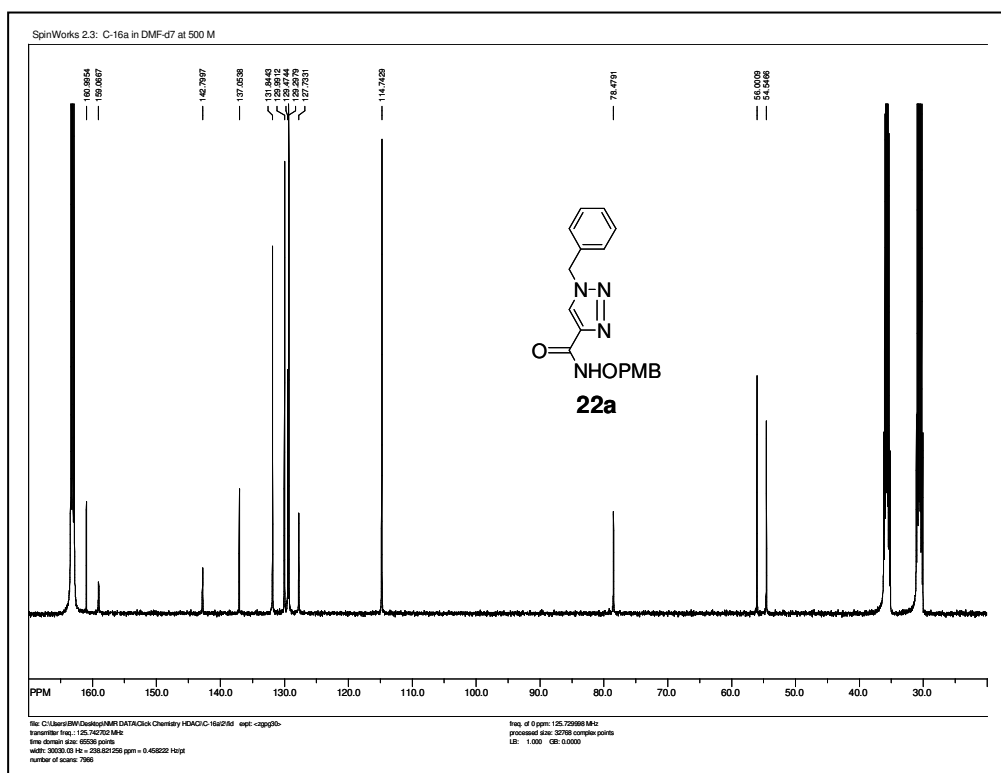

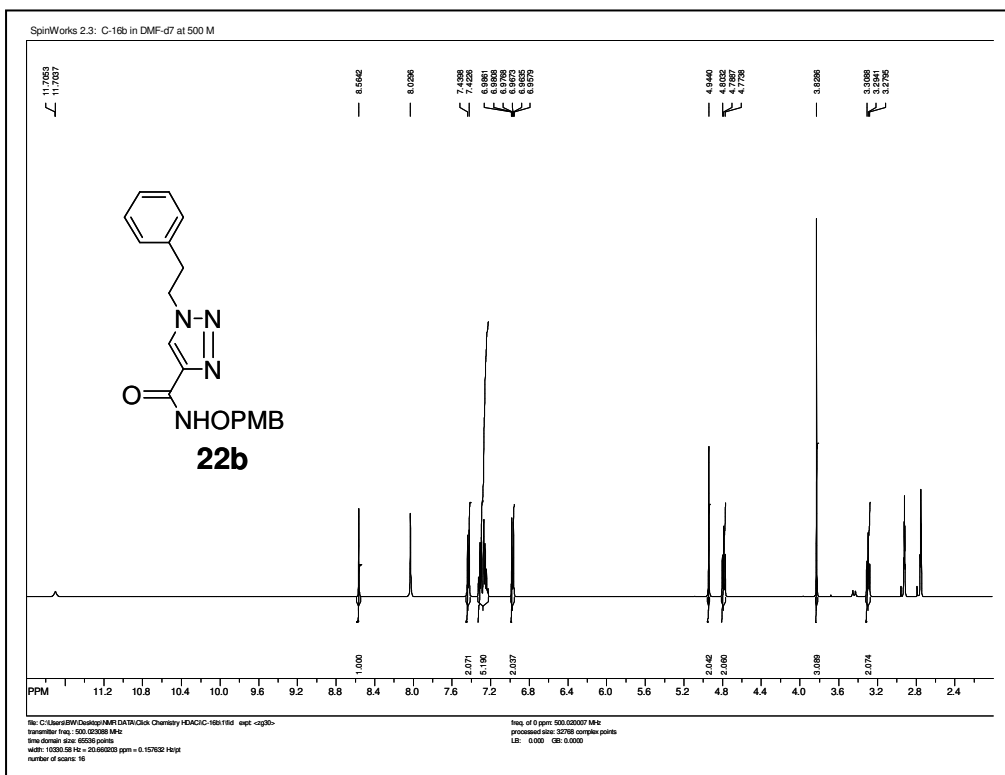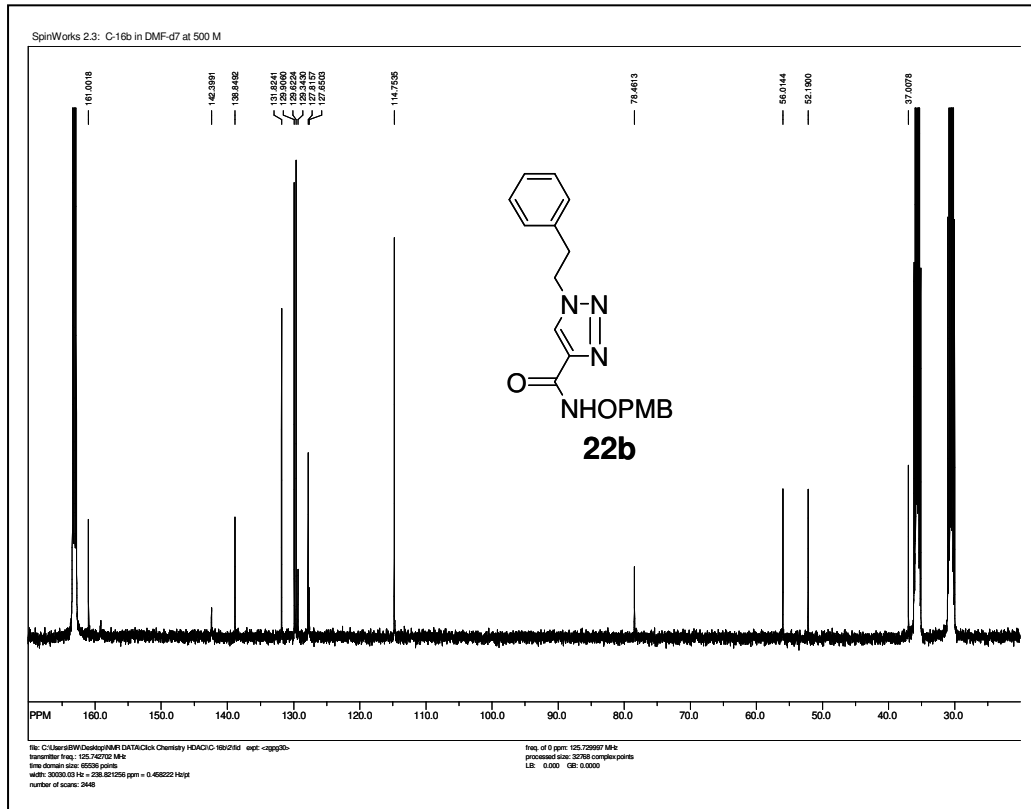

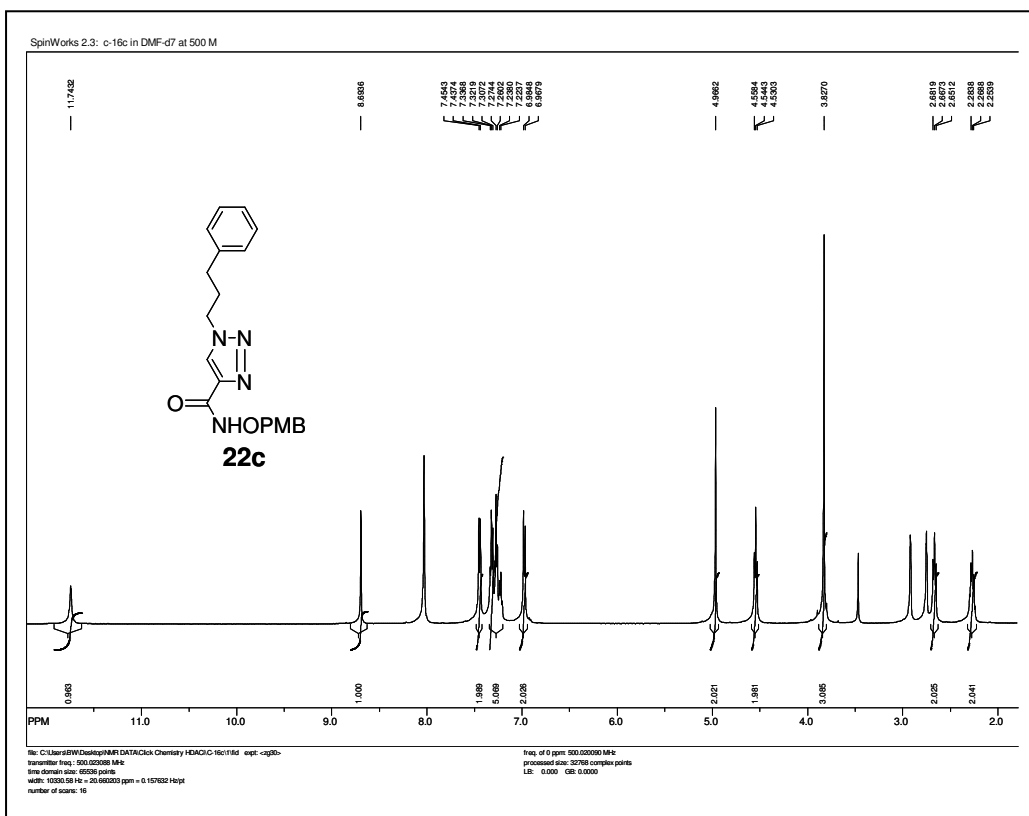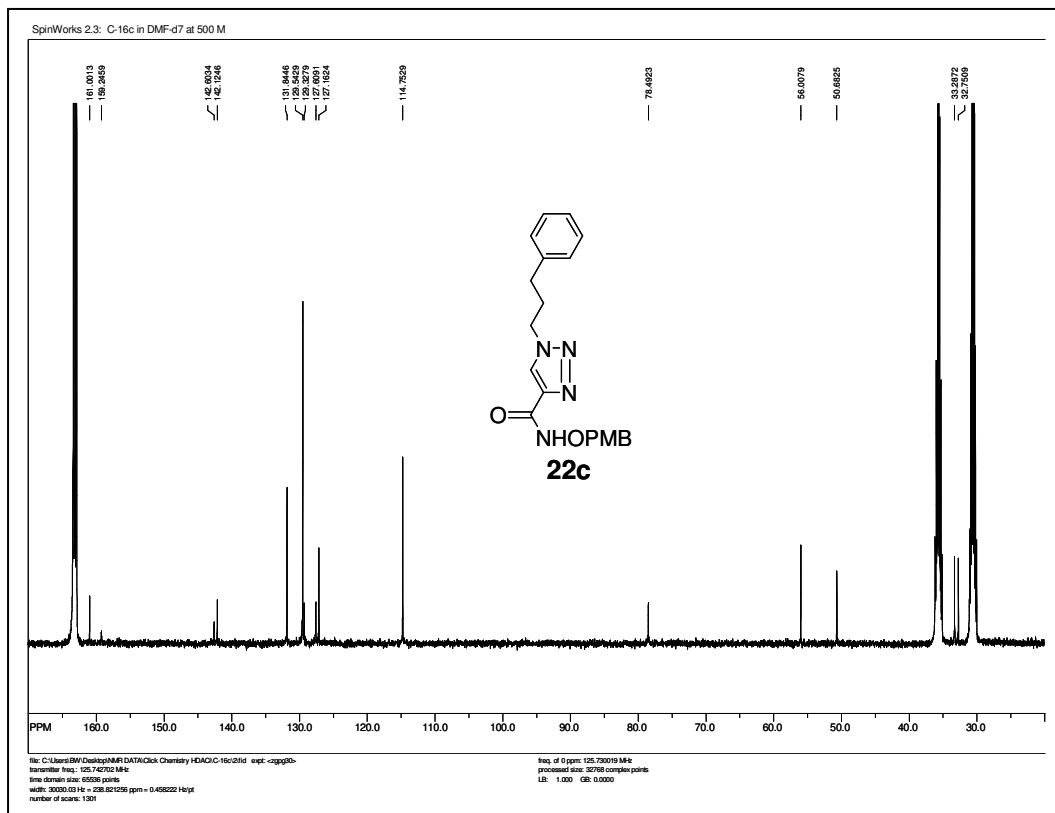



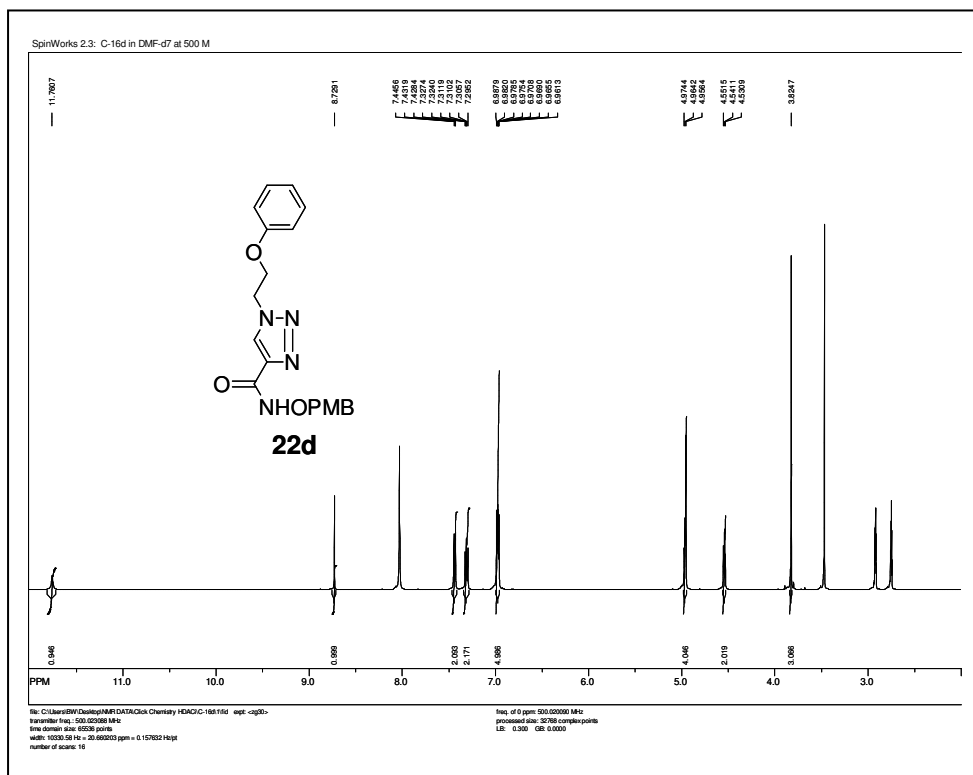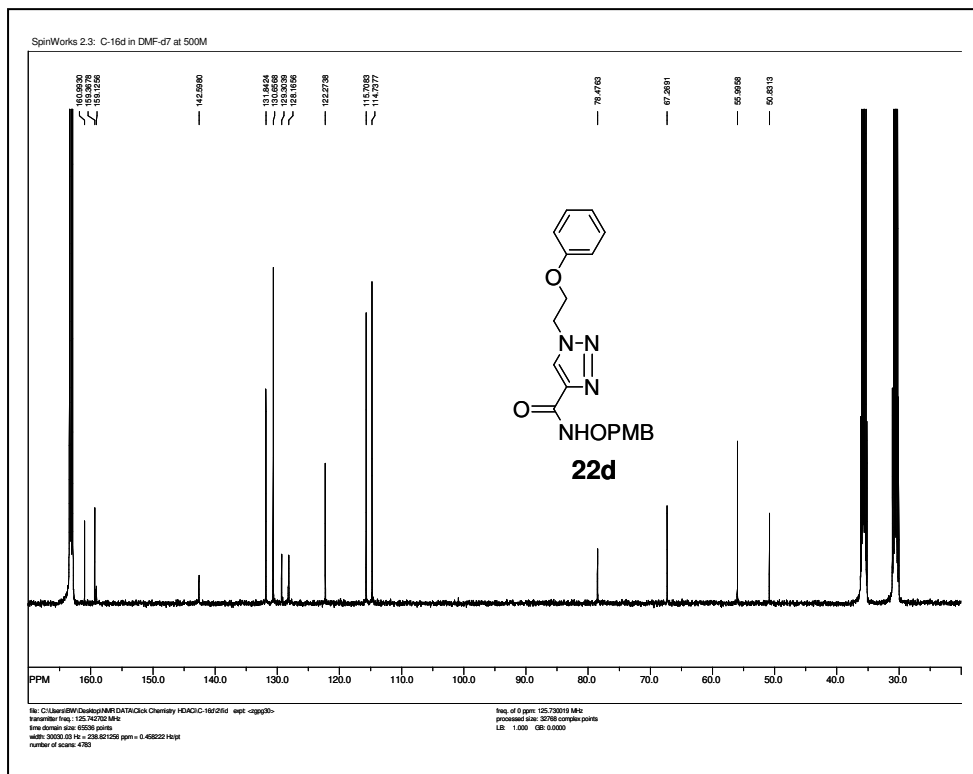

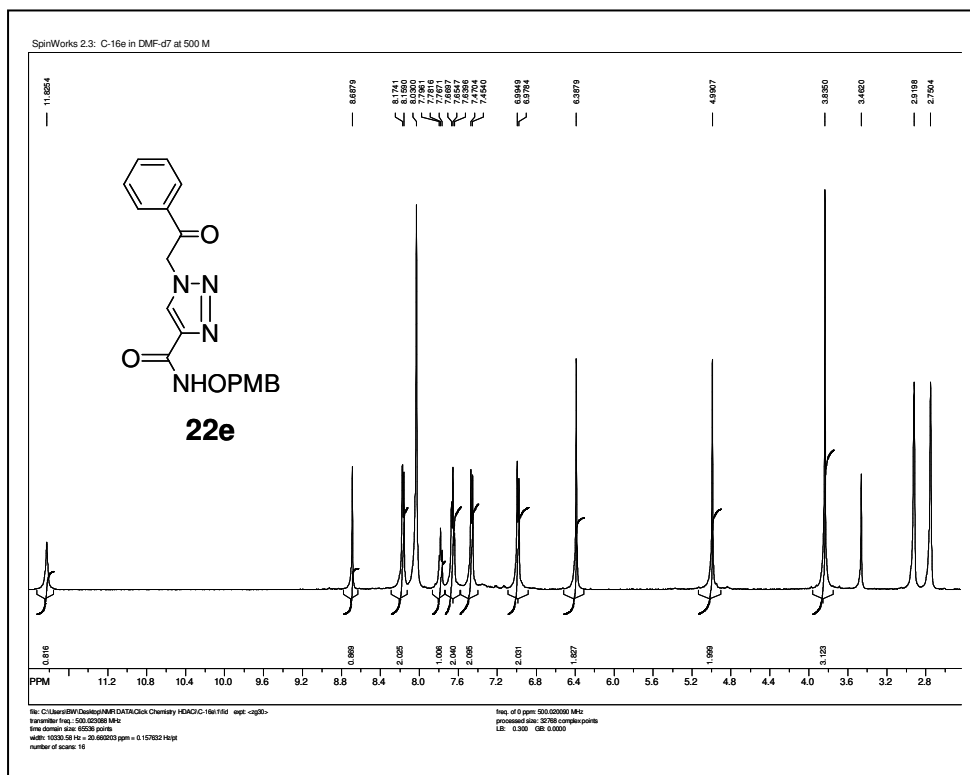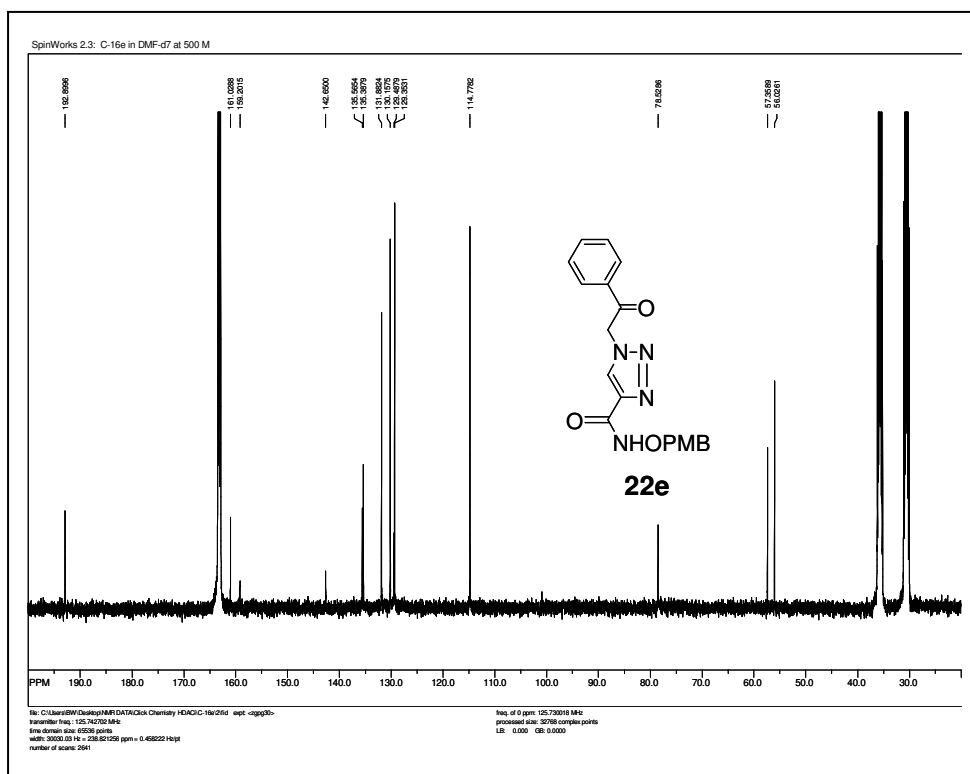

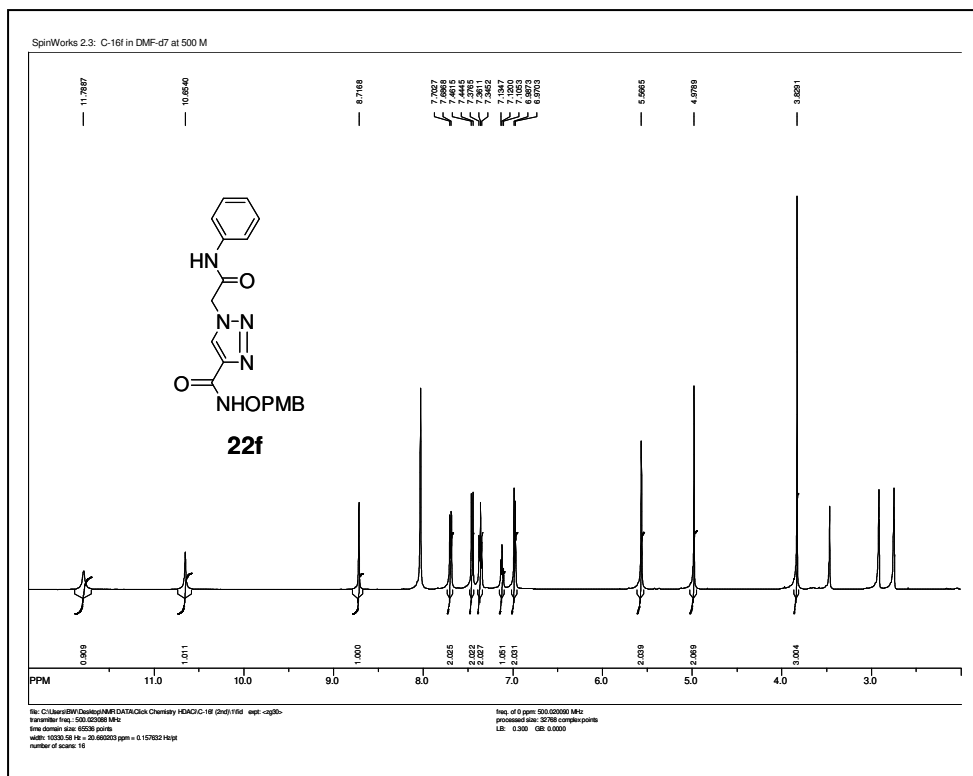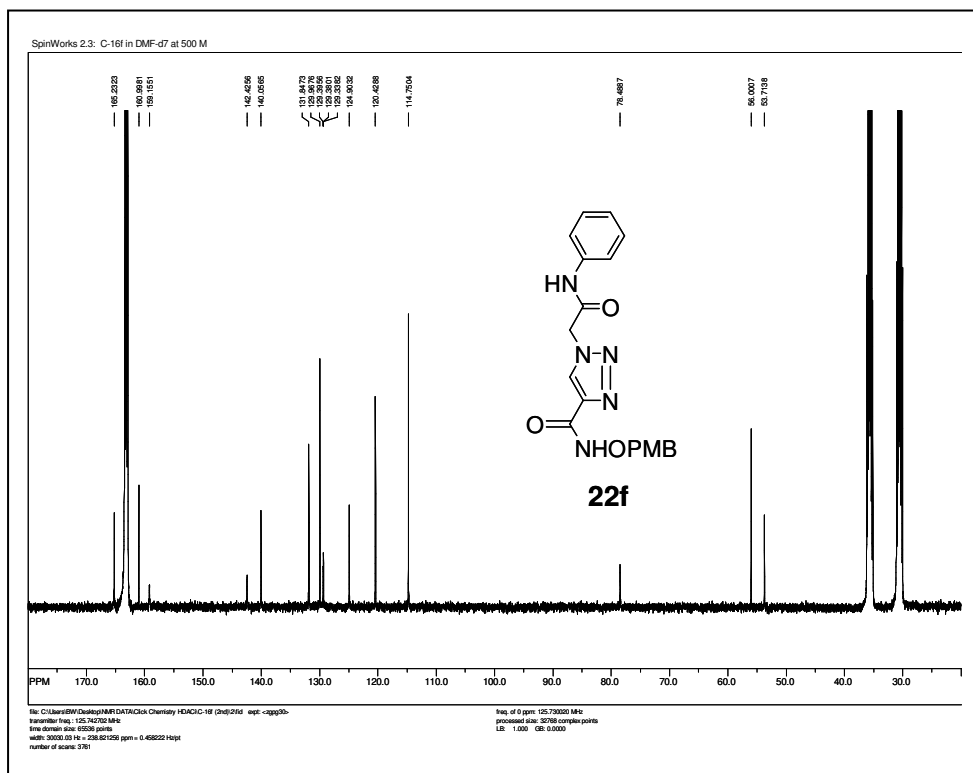

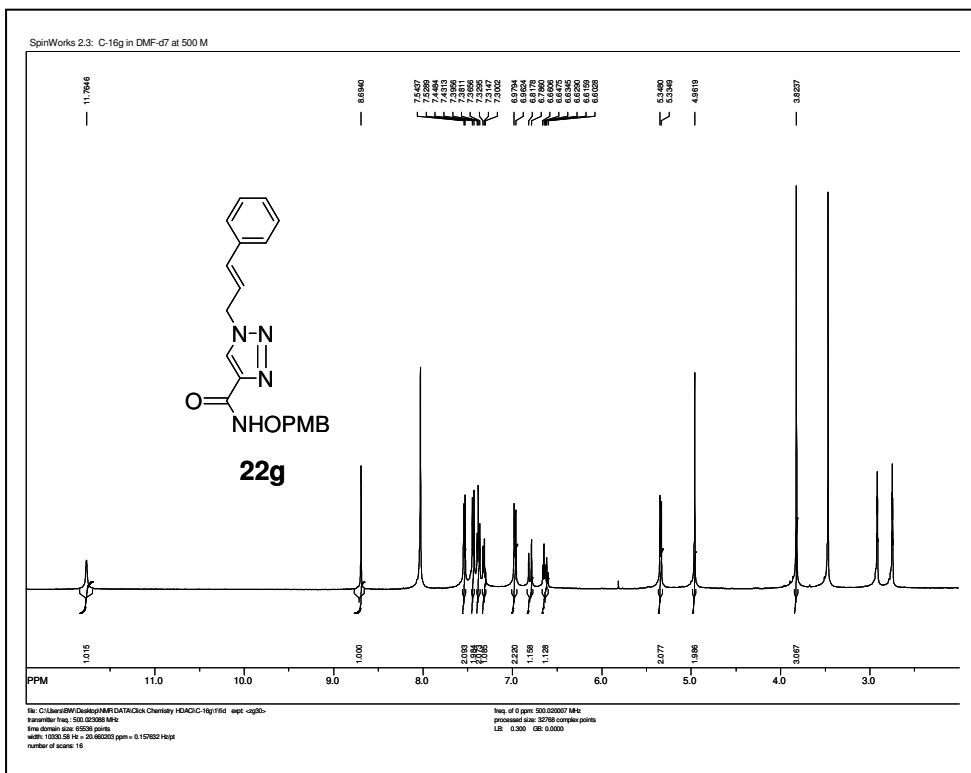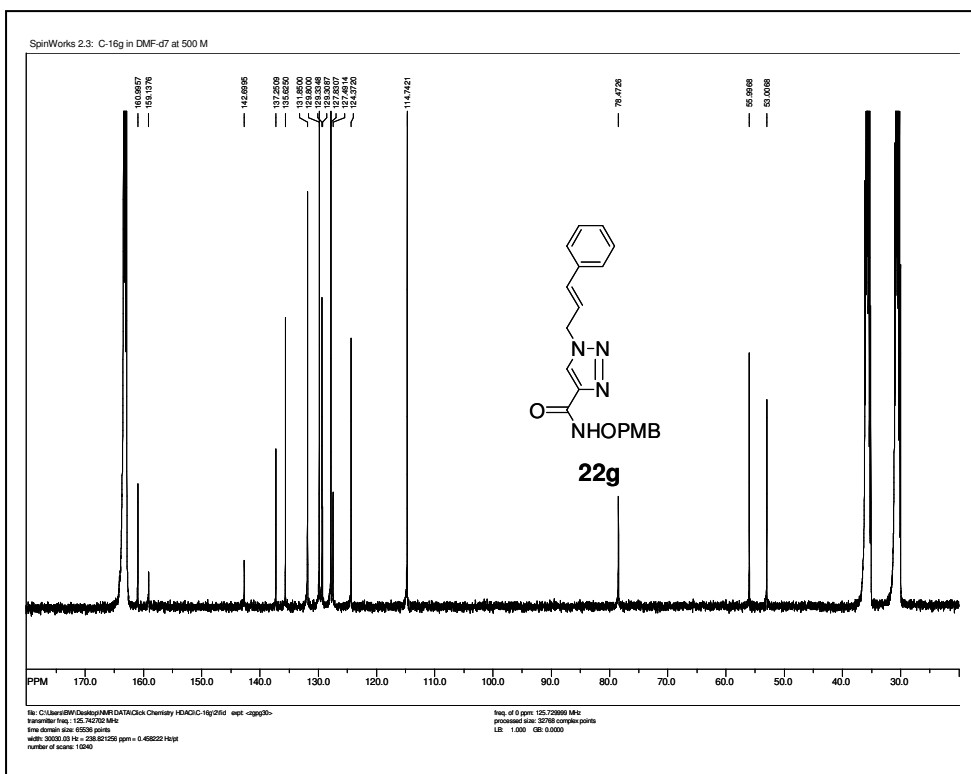

Average inhibition values of a 10- $\mu$ M-HDACi-treatment of the NIH cancer cell lines <sup>(a, b)</sup>

|          | <b>SAHA</b> | <b>5b</b> | <b>5e</b> | <b>5f</b> | <b>5g</b> | <b>6e</b>          | <b>6g</b>          |
|----------|-------------|-----------|-----------|-----------|-----------|--------------------|--------------------|
| Lung     | 0 %         | 45 %      | 53 %      | 68 %      | 1 %       |                    |                    |
| Colon    | -10 %       | 51 %      | 78 %      | 83 %      | -25 %     |                    |                    |
| Breast   | -3 %        | 40 %      | 78 %      | 71 %      | 8 %       |                    |                    |
| Ovarian  | -4 %        | 48 %      | 65 %      | 74 %      | 1 %       | NSI <sup>(c)</sup> | NSI <sup>(c)</sup> |
| Leukemia | 0 %         | 7 %       | 104 %     | 84 %      | -6 %      |                    |                    |
| Renal    | -23 %       | 46 %      | 65 %      | 90 %      | -20 %     |                    |                    |
| Melanoma | -18 %       | 33 %      | 60 %      | 69 %      | -43 %     |                    |                    |
| Prostate | 6 %         | 36 %      | 66 %      | 84 %      | -9 %      |                    |                    |
| CNS      | 5 %         | 58 %      | 67 %      | 89 %      | -18 %     |                    |                    |
| Total    | -7 %        | 42 %      | 70 %      | 78 %      | -12 %     | 101 %              | 103 %              |

(a) The data listed were the average percentage by which the 10  $\mu$ M-HDACi-treatment inhibited the growth of cancer cell lines. Without the HDACi treatment, after a 48 hour incubation, the cell number corresponds to 100%. The cell number at the initial moment corresponds to 0%.

(b) A negative percentage indicates that the HDACi at 10  $\mu$ M decreases the cell number in comparison to the number seen at the initial moment.

(c) NSI means no significant inhibition of cell growth (> 95 %).

The following graphs present the inhibition values for 10-uM-HDACi-treatments of the NIH cancer cell lines. The average inhibition values presented above was derived from these graphs.

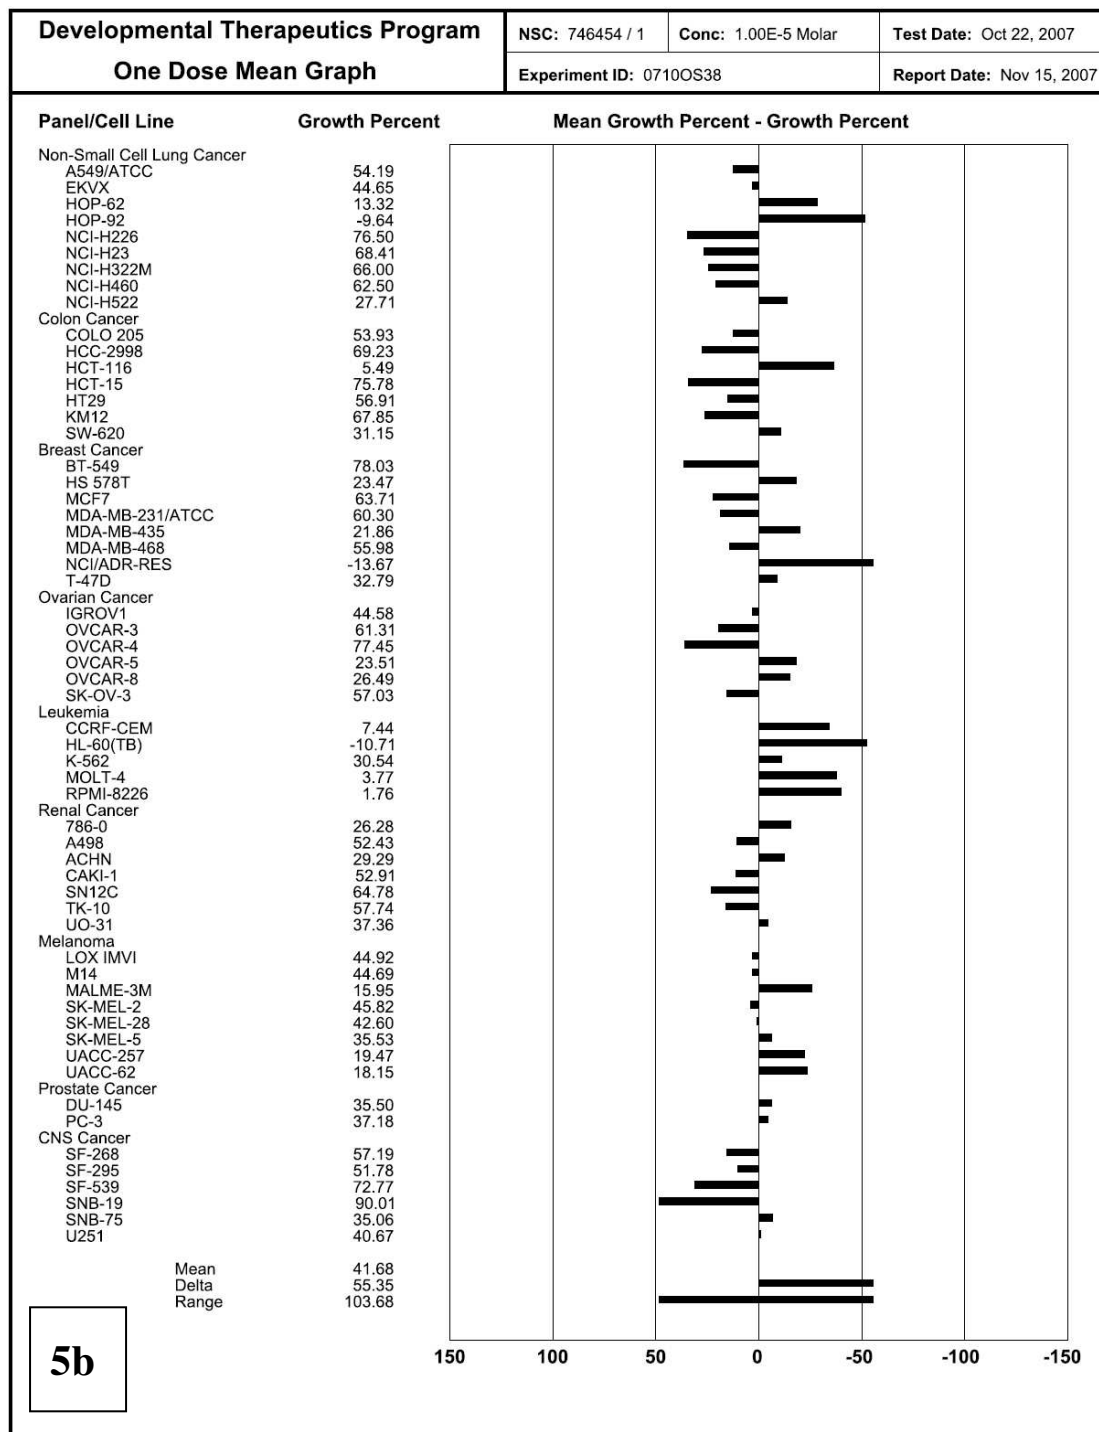

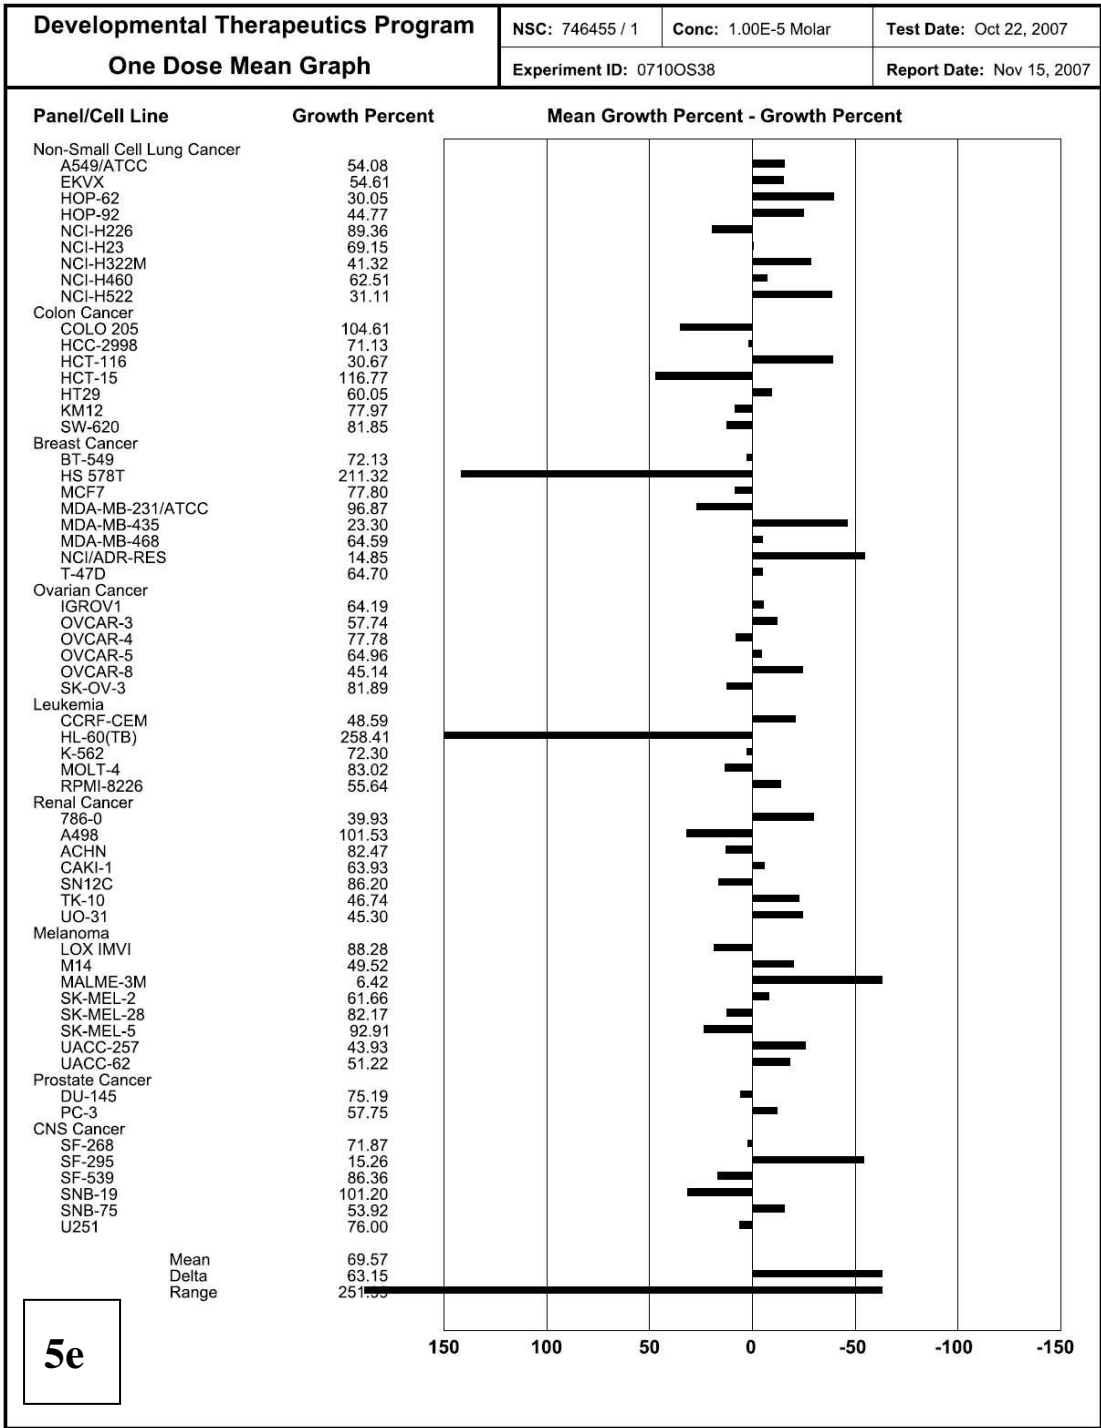

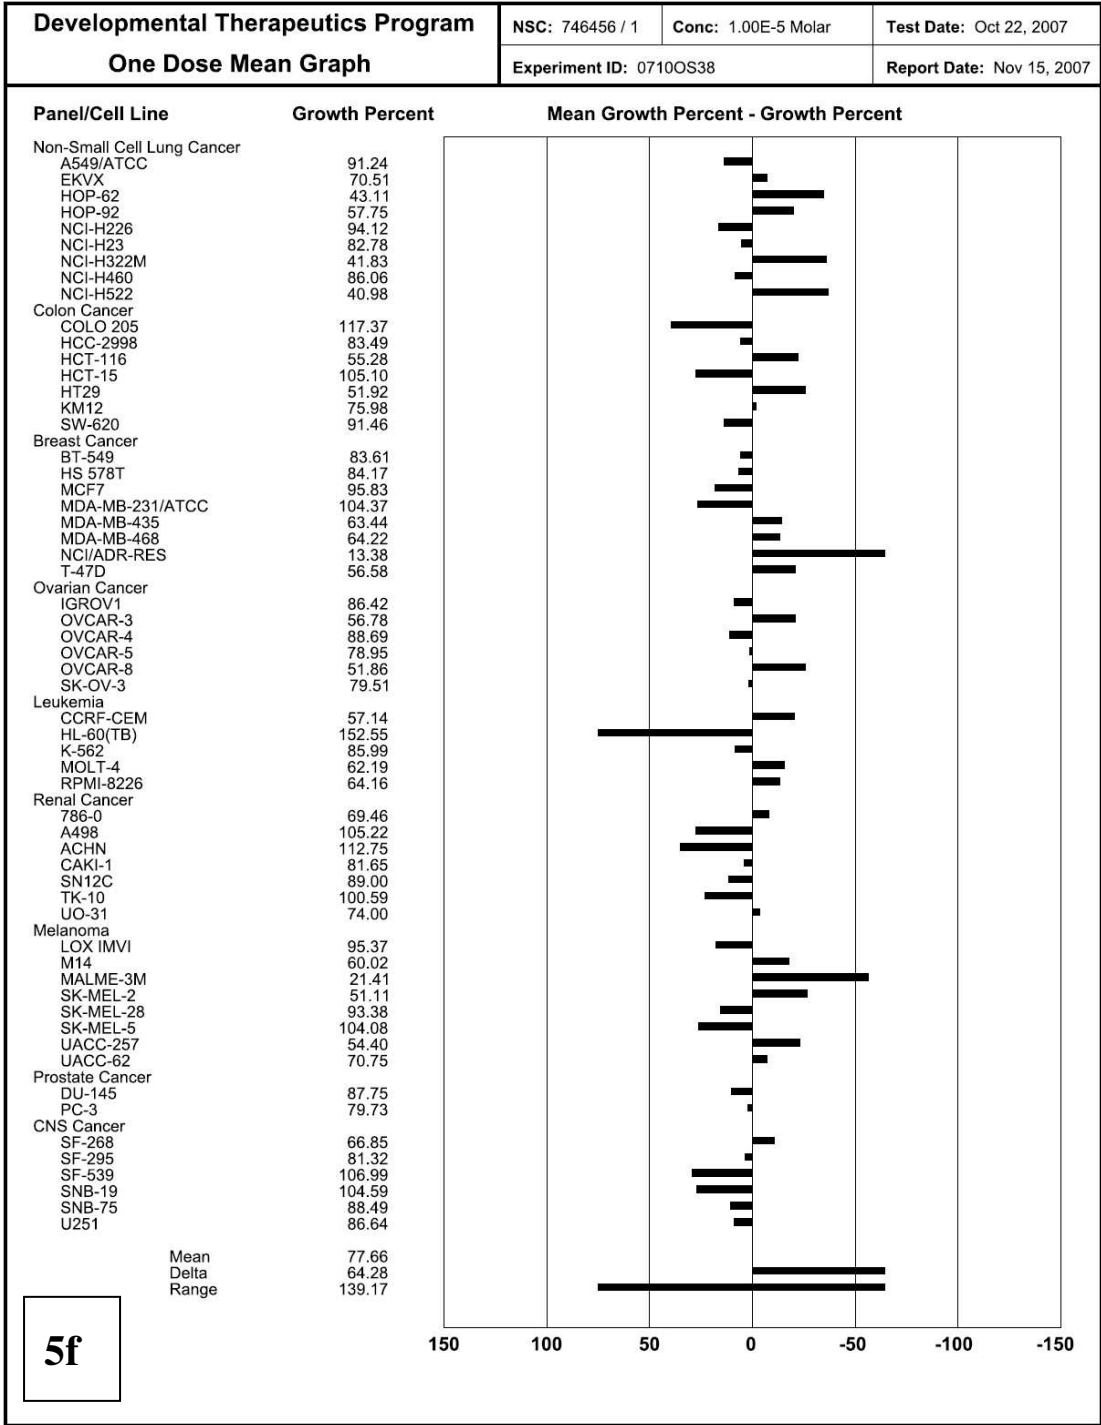



**Developmental Therapeutics Program**

NSC: 746457 / 1

Conc: 1.00E-5 Molar

Test Date: Oct 22, 2007

**One Dose Mean Graph**

Experiment ID: 07100S38

Report Date: Nov 15, 2007

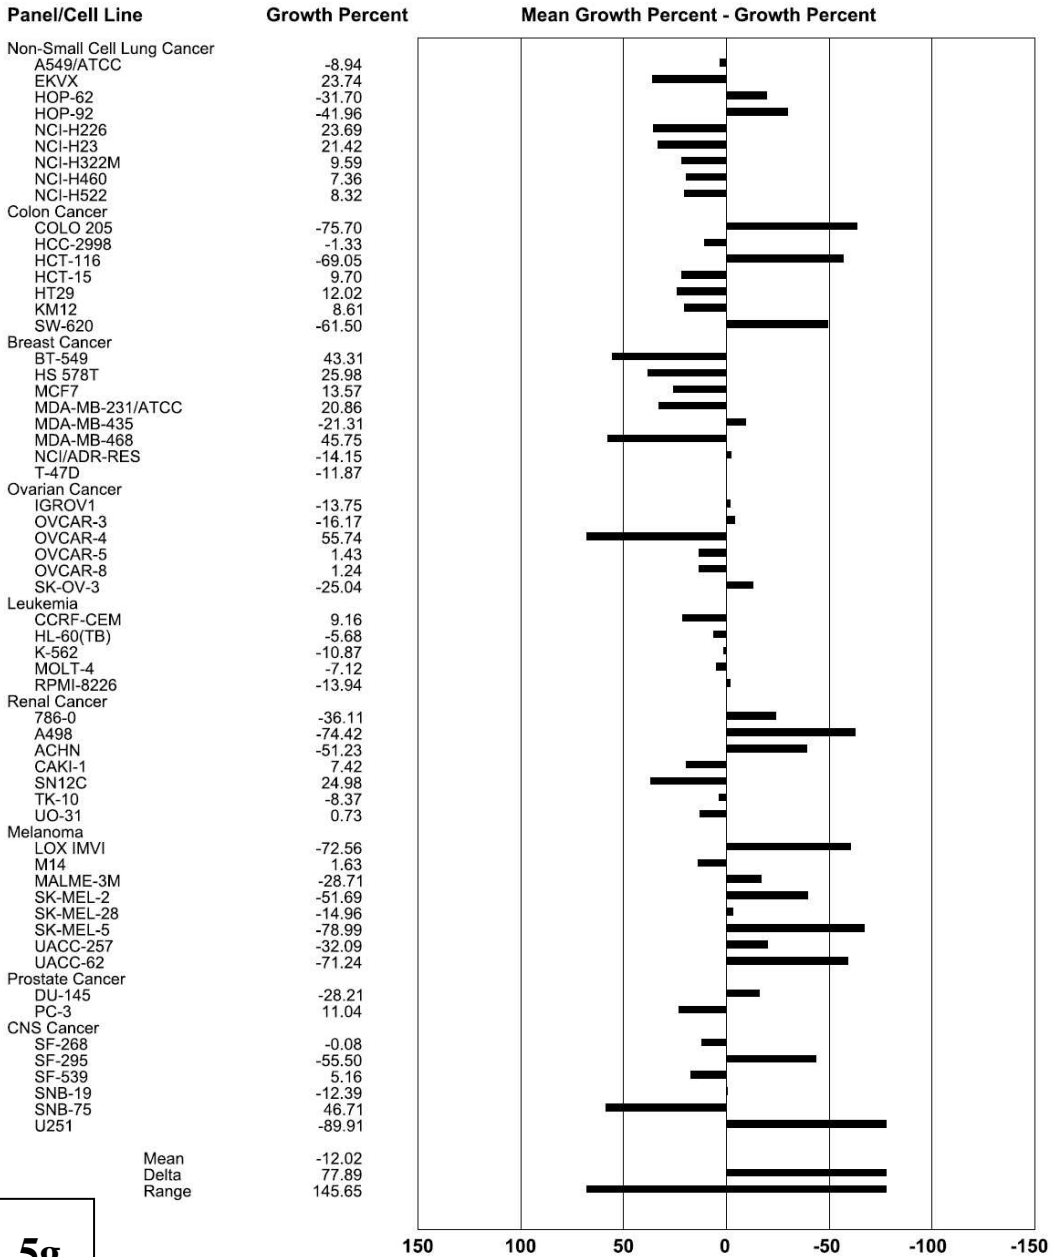

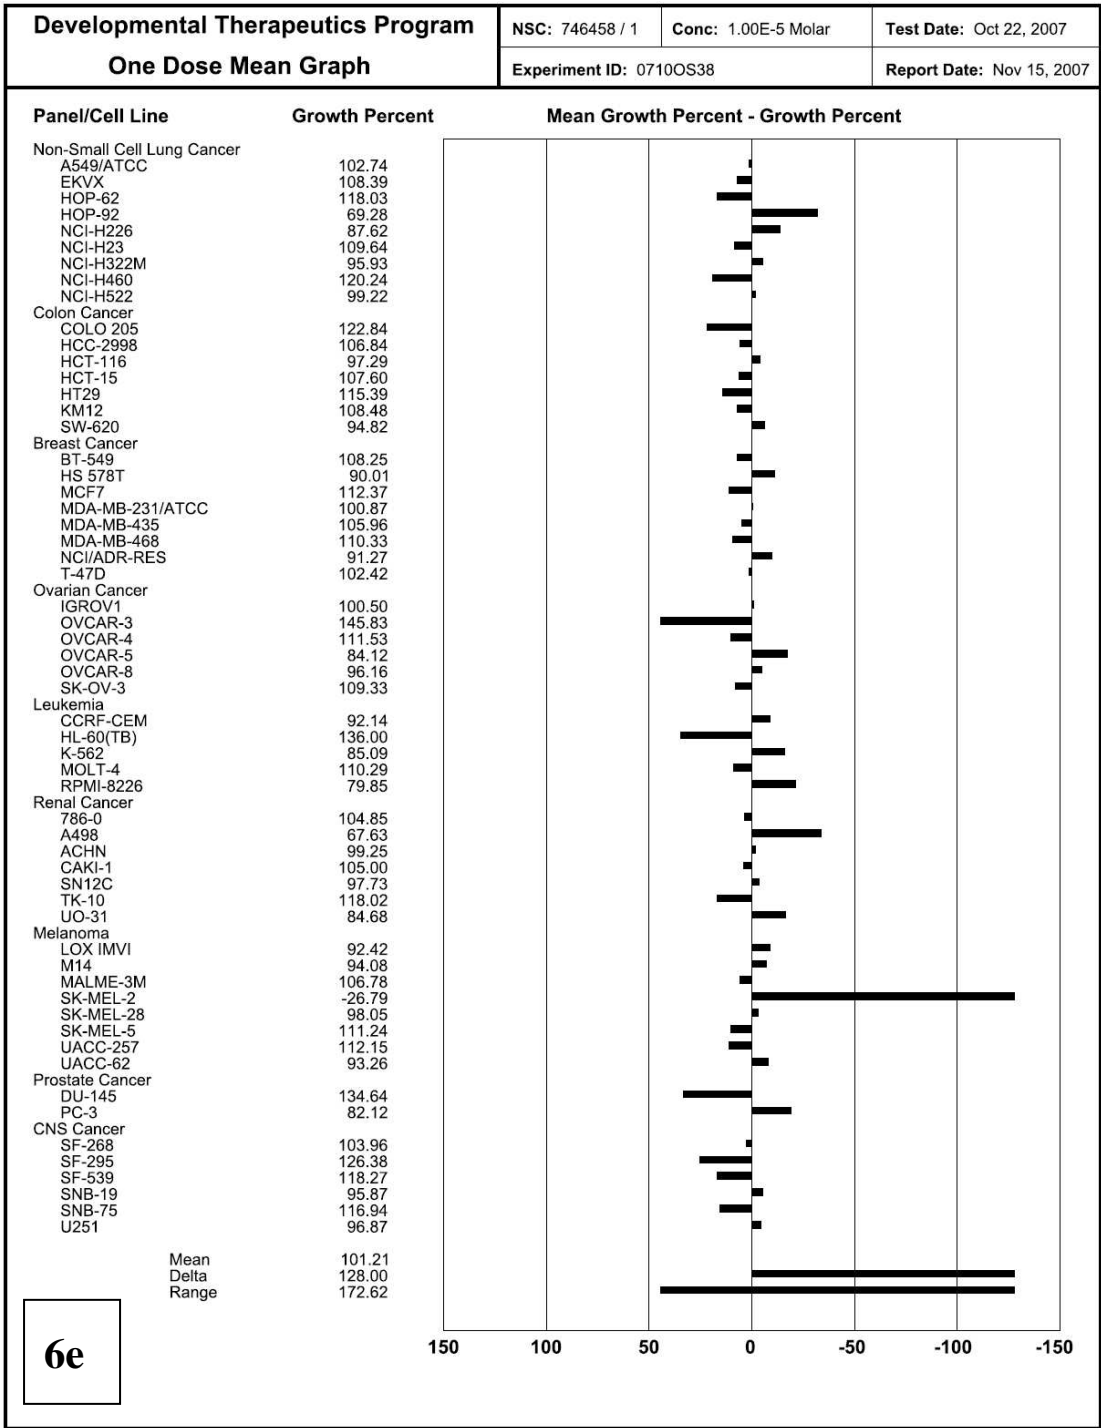

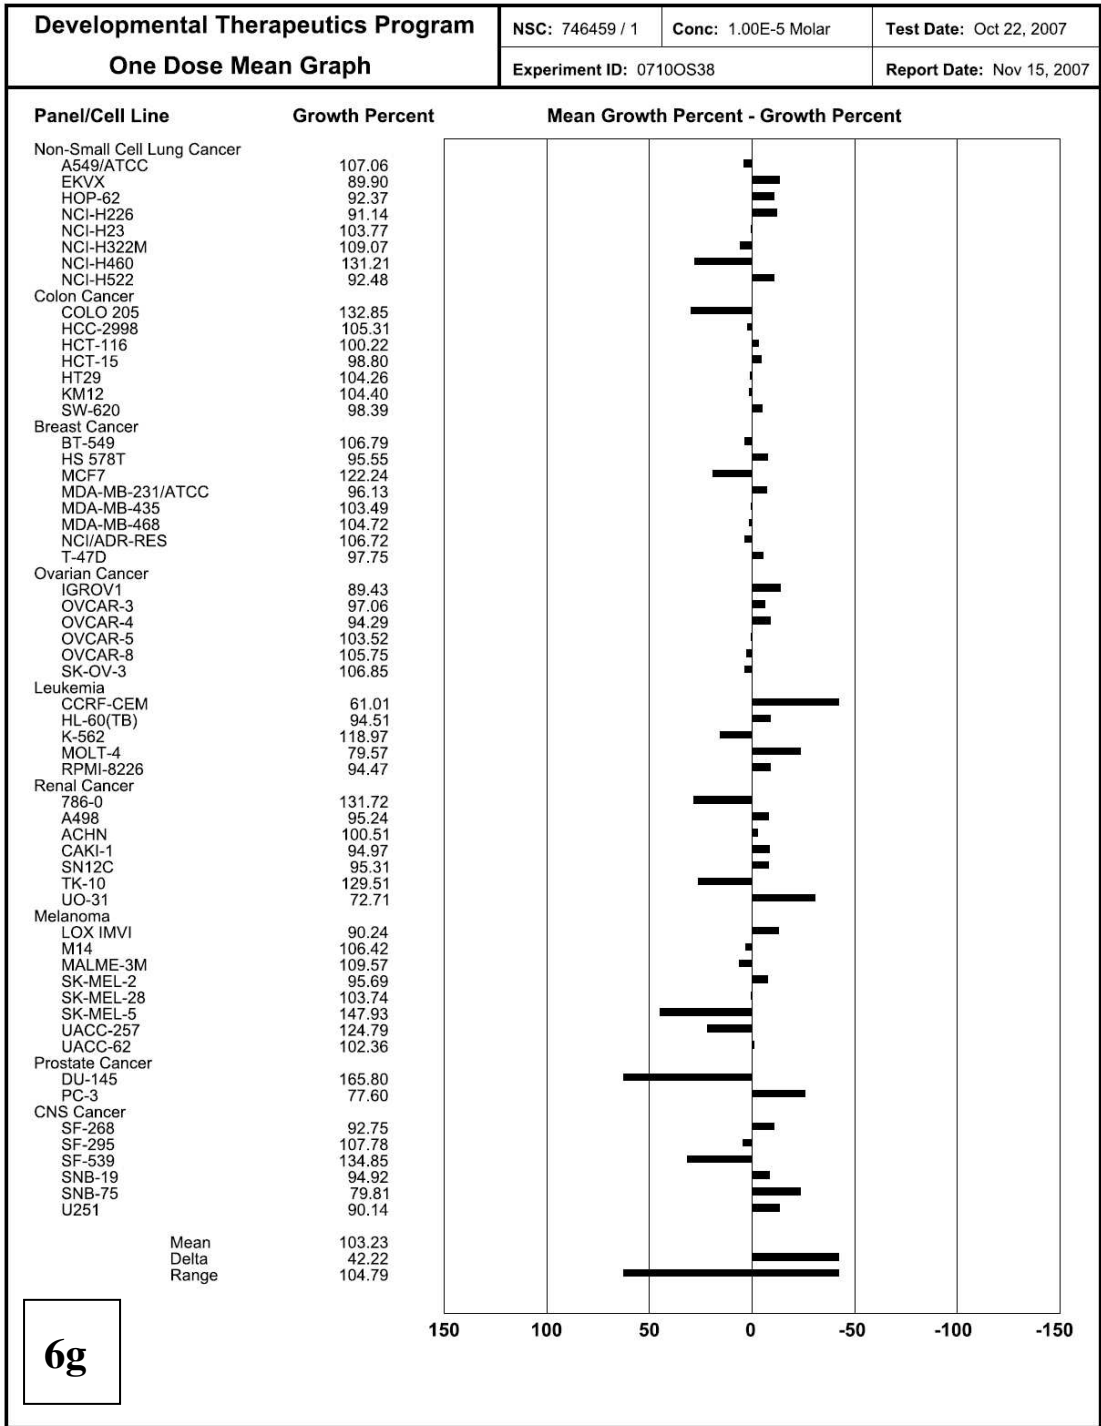

**6g**
